# Supplementary material for: p38 MAPK regulates PKAα and CUB-serine protease in Amphibalanus amphitrite cyprids
Source: PubMed Central journal article supplement (PMC4593178; doi:10.1038/srep14767), 2015-10-05
Supplement: srep14767-s1.pdf [file srep14767-s1.pdf]

**p38 MAPK regulates PKA $\alpha$  and CUB-serine protease in  
*Amphibalanus amphitrite* cyprids**

ZHANG Gen<sup>1</sup>, HE Li-sheng<sup>2</sup>, WONG Yue Him<sup>1</sup>, XU Ying<sup>3</sup>, ZHANG Yu<sup>3</sup>, QIAN  
Pei-yuan<sup>1\*</sup>

**Supplementary information**

```

H. longicornis CUB  AGRD I R V T G L T S G I L V T P G F T G G Q P V P H N F Q G A V T I Q A P R 40
P. argus CUB       CGAR V T V T P G S S V T F Q S T N Y P S S Y P N R E - - N C F W R F Q A A D 38
A. amphitrite CUB1 C D S H V - I A E G S T V V I E S P N Y P S N Y P N Y E - - D C V Y T L T T D - 36
A. amphitrite CUB2 C G G S R - L A R G Q H T I T D G D - - - G D Y S N N V - - D C Y Y Q L Y A D Q 34
      ↑
H. longicornis CUB  G F S R I R L E F Q E F D L E T S P Q C S G D R L V V R E - - - G N M A P D I 76
P. argus CUB       P Q D T L T V E C S P F N V R G S N S C T R D R L I F G E K V V G R Y F Q S T R 78
A. amphitrite CUB1 T G K D L E L S C E A F D L E S H S Q C R Y D W L R V N G - - - - - I K 67
A. amphitrite CUB2 A G D Q L S V T C S Q F D V E S H S S C A Y D W L S V D G - - - - - N K 65
      ↑
H. longicornis CUB  F C S N Q R P K A Y L S Q S S L V N L L L V T D G L K R S R G F R I R F T A T 115
P. argus CUB       Y C G V G F Y E P Y I S F S S T L F V R F R T D R S S T A S G F S C E V T V T 117
A. amphitrite CUB1 Y C G S - S G P S T V A A P - Q L D I D F H S D Y S V V R S G Y R C T V T L V 104
A. amphitrite CUB2 F C G S - N G P S G V A A I D Q M A I H W H T D Y S V V R S G F V C A V T V G 103
      ↑

```

**Figure S1. Amino acid sequence alignment of the CUB domain from *A. amphitrite*, *H. longicornis* and *P. argus*. Six conserved cysteine residues are labeled with red arrows.**

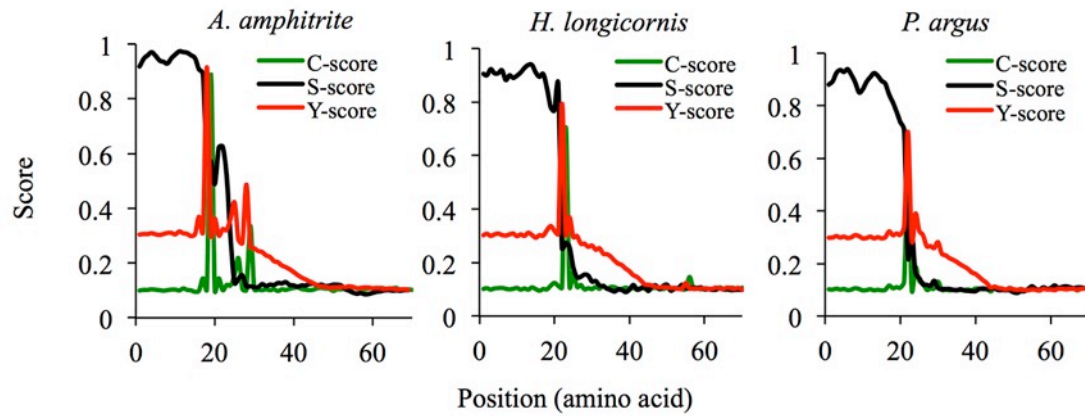

**Figure S2. Signal peptide prediction of the CUB-serine protease from *A. amphitrite*, *H. longicornis* and *P. argus*.** The C-score (raw cleavage site score), S-score (signal peptide score) and Y-score (combined cleavage site score) were calculated using SignalP 4.1 Server.

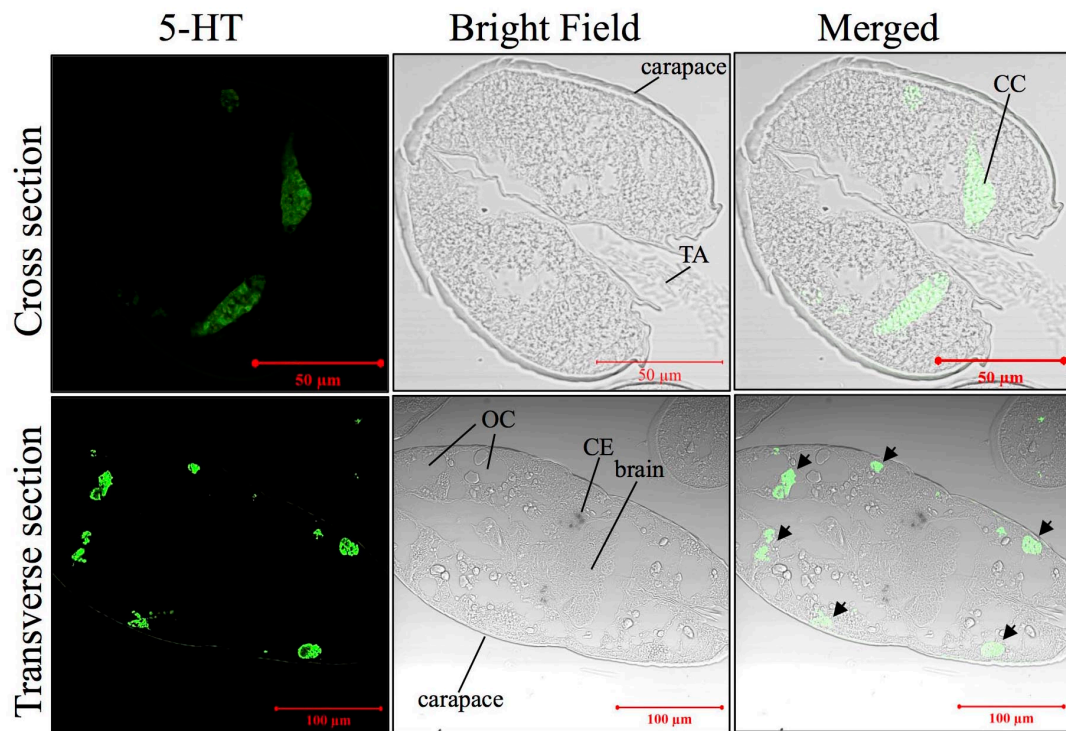

**Figure S3. Immunostaining of serotonin in cyprid sections.** Signals were revealed at the circumesophageal connectives in the cross sections. In the transverse sections, symmetrical singles were localized to nerve fibers nearby cyprid body wall (indicated with arrows). TA: thoracic appendage; CC: circumesophageal connective; OC: oil cell; CE: compound eye.

|                        |                                                                                                                                                                       |     |
|------------------------|-----------------------------------------------------------------------------------------------------------------------------------------------------------------------|-----|
| <i>A. amphitrite</i>   | RRRGAISAEPVTEDDATSYVKKVVPKDYKTM <del>E</del> ALSKAIAKNVLF <del>S</del> HLDEN                                                                                          | 50  |
| <i>H. sapiens</i>      | RRRGAISAEVYTEEDAASVYRKVI <del>I</del> PKDYKTMAALAKAIE <del>E</del> KNVLF <del>S</del> HLD <del>D</del> EN                                                             | 50  |
| <i>D. melanogaster</i> | RRRGGISAEPVTEEDATN <del>N</del> YVKKVVPKDYKTM <del>N</del> ALSKAIAKNVLF <del>A</del> HLD <del>E</del> S                                                               | 50  |
| <i>M. rotundata</i>    | RRRGGISAEPVSEEDATSYVKKVVPKDYKTM <del>A</del> ALSKAIAKNVLF <del>A</del> HLDEN                                                                                          | 50  |
| <i>C. capitata</i>     | RRRGGISAEPVTEEDATSYVKKVVPKDYKTM <del>A</del> ALSKAIAKNVLF <del>S</del> HLDEN                                                                                          | 50  |
| <i>A. mellifera</i>    | RRRGGISAEPVSEEDATSYVKKVVPKDYKTM <del>A</del> ALSKAIAKNVLF <del>A</del> HLDEN                                                                                          | 50  |
| <i>C. capitata</i>     | RRRGGISAEPVTEEDATSYVKKVVPKDYKTM <del>A</del> ALSKAIAKNVLF <del>S</del> HLDEN                                                                                          | 50  |
| <i>A. aegypti</i>      | RRRGGISAEPVSEEDATSYVKKVVPKDYKTM <del>A</del> ALSKAIAKNVLF <del>A</del> HLDEN                                                                                          | 50  |
| <i>R. pedestris</i>    | RRRGGISAEPVTEEDATSYVKKVVPKDYKTM <del>A</del> ALSKAIAKNVLF <del>S</del> HLDEN                                                                                          | 50  |
|                        |                                                                                                                                                                       |     |
| <i>A. amphitrite</i>   | ERSDIFDAMFSQTFLKGETI <del>I</del> KQGDEGDNFYVIDSGD <del>V</del> EVYVNDALVTTI                                                                                          | 100 |
| <i>H. sapiens</i>      | ERSDIFDAMFSV <del>S</del> FIAGETVI <del>I</del> QQGDEGDNFYVIDQGETD <del>V</del> YVNN <del>E</del> WATS <del>V</del>                                                   | 100 |
| <i>D. melanogaster</i> | ERSDIFDAMFPVNHIA <del>G</del> ENI <del>I</del> QQGDEGDNFYVIDVGEV <del>D</del> VFNSELVTTI                                                                              | 100 |
| <i>M. rotundata</i>    | ERSDIFDAMFPVTF <del>L</del> PGEA <del>I</del> RQGDEGDNFYVIDQGEVE <del>I</del> FVNGELVTTI                                                                              | 100 |
| <i>C. capitata</i>     | ERSDIFDAMFPVTH <del>L</del> MGENI <del>I</del> QQGDEGDNFYVIDHGEVE <del>V</del> FVNS <del>E</del> LVTTI                                                                | 100 |
| <i>A. mellifera</i>    | ERSDIFDAMFPVTF <del>L</del> PGEA <del>I</del> RQGDEGDNFYVIDQGEVE <del>I</del> FVNGEL <del>A</del> TTI                                                                 | 100 |
| <i>C. capitata</i>     | ERSDIFDAMFPVTH <del>L</del> MGENI <del>I</del> QQGDEGDNFYVIDHGEVE <del>V</del> FVNS <del>E</del> LVTTI                                                                | 100 |
| <i>A. aegypti</i>      | ERSDIFDAMFP <del>C</del> TFLPGESI <del>I</del> QQGDEGDNFYVIDIGEVE <del>V</del> FVNN <del>E</del> LVTTI                                                                | 100 |
| <i>R. pedestris</i>    | ERSDIFDAMFPV <del>N</del> FLPGETI <del>I</del> QQGDEGDNFYVIDQGEVE <del>V</del> YVNS <del>E</del> LVTTI                                                                | 100 |
|                        |                                                                                                                                                                       |     |
| <i>A. amphitrite</i>   | SEGGSGF <del>E</del> LAL <del>I</del> YGT <del>P</del> RAATV <del>K</del> AS <del>S</del> DV <del>K</del> LW <del>A</del> IDRDTYRRILMGSTIRK <del>R</del> K            | 150 |
| <i>H. sapiens</i>      | GEGGSFGELAL <del>I</del> YGT <del>P</del> RAATV <del>K</del> AKT <del>N</del> V <del>K</del> LWGIDRDSYRRILMGST <del>L</del> RK <del>R</del> K                         | 150 |
| <i>D. melanogaster</i> | SEGGSGF <del>E</del> LAL <del>I</del> YGT <del>P</del> RAATV <del>R</del> AKTDV <del>K</del> LWGIDRDSYRRILMGSTIRK <del>R</del> K                                      | 150 |
| <i>M. rotundata</i>    | GEGGSFGELAL <del>I</del> YGT <del>P</del> RAATV <del>R</del> AKTDV <del>K</del> LWGIDRDSYRRILMGSTIRK <del>R</del> K                                                   | 150 |
| <i>C. capitata</i>     | GEGGSFGELAL <del>I</del> YGT <del>P</del> RAATV <del>R</del> AKTDV <del>K</del> LWGIDRDSYRRILMGSTIRK <del>R</del> K                                                   | 150 |
| <i>A. mellifera</i>    | GEGGSFGELAL <del>I</del> YGT <del>P</del> RAATV <del>R</del> AKTDV <del>K</del> LWGIDRDSYRRILMGSTIRK <del>R</del> K                                                   | 150 |
| <i>C. capitata</i>     | GEGGSFGELAL <del>I</del> YGT <del>P</del> RAATV <del>R</del> AKTDV <del>K</del> LWGIDRDSYRRILMGSTIRK <del>R</del> K                                                   | 150 |
| <i>A. aegypti</i>      | SEGGSGF <del>E</del> LAL <del>I</del> YGT <del>P</del> RAATV <del>R</del> AKTDV <del>K</del> LWGIDRDSYRRILMGSTIRK <del>R</del> K                                      | 150 |
| <i>R. pedestris</i>    | GEG <del>S</del> SFGELAL <del>I</del> YGT <del>P</del> RAATV <del>K</del> AKT <del>A</del> V <del>K</del> LWGIDRDSYRRILMGSTIRK <del>R</del> K                         | 150 |
|                        |                                                                                                                                                                       |     |
| <i>A. amphitrite</i>   | MYEEFLSRVSI <del>E</del> SLDKWERLTVAD <del>S</del> LEPVSFA <del>D</del> GETIVRQGE <del>P</del> GDDFYI                                                                 | 200 |
| <i>H. sapiens</i>      | MYEEFLS <del>K</del> VSI <del>E</del> SLDKWERLTVADALEP <del>V</del> Q <del>F</del> EDGQ <del>K</del> IV <del>V</del> QGE <del>P</del> GDE <del>F</del> F <del>I</del> | 200 |
| <i>D. melanogaster</i> | MYEEFLSRVSI <del>E</del> SLDKWERLTVAD <del>S</del> LET <del>C</del> S <del>F</del> DDGETIV <del>K</del> QGA <del>A</del> GDDFYI                                       | 200 |
| <i>M. rotundata</i>    | MYEEFLSRVSI <del>E</del> SLDKWERLTVADALEP <del>V</del> A <del>F</del> DDGETIVRQGE <del>P</del> GEDFYI                                                                 | 200 |
| <i>C. capitata</i>     | MYEEFLSRVSI <del>E</del> SLDKWERLTVADALEPVS <del>F</del> EDGETIV <del>K</del> QGE <del>P</del> GDDFYI                                                                 | 200 |
| <i>A. mellifera</i>    | MYEEFLSRVSI <del>E</del> SLDKWERLTVADALEP <del>V</del> A <del>F</del> DDGETIVRQGE <del>P</del> GEDFYI                                                                 | 200 |
| <i>C. capitata</i>     | MYEEFLSRVSI <del>E</del> SLDKWERLTVADALEPVS <del>F</del> EDGETIV <del>K</del> QGE <del>P</del> GDDFYI                                                                 | 200 |
| <i>A. aegypti</i>      | MYEEFLSRVSI <del>E</del> SLDKWERLTVADALEPVS <del>F</del> EDGETIVRQGE <del>P</del> GNDFYI                                                                              | 200 |
| <i>R. pedestris</i>    | MYE <del>G</del> FLSRVSI <del>E</del> SLDKWERLTVADALEPVS <del>F</del> S <del>D</del> GETIVRQGE <del>P</del> GDDFYI                                                    | 200 |
|                        |                                                                                                                                                                       |     |
| <i>A. amphitrite</i>   | I <del>V</del> EGRAAVLQR <del>R</del> TEG- <del>E</del> QEQEVGQLG <del>P</del> SDYFGEIALM <del>L</del> DRPRAATVVARG                                                   | 249 |
| <i>H. sapiens</i>      | I <del>L</del> EGSA <del>A</del> V <del>L</del> QR <del>R</del> SEN- <del>E</del> EFVEVGR <del>L</del> GPSDYFGEIALL <del>M</del> N <del>R</del> PRAATVVARG            | 249 |
| <i>D. melanogaster</i> | I <del>L</del> EGCAV <del>L</del> QR <del>R</del> SEG- <del>E</del> EPAEVGR <del>L</del> GPSDYFGEIALL <del>L</del> DRPRAATVVARG                                       | 249 |
| <i>M. rotundata</i>    | I <del>V</del> EGTAV <del>L</del> QR <del>R</del> SEG- <del>E</del> EPAEVGR <del>L</del> GPSDYFGEIALL <del>L</del> DRPRAATVVARG                                       | 249 |
| <i>C. capitata</i>     | I <del>L</del> DGTAV <del>L</del> QR <del>R</del> AEG <del>Q</del> DEPAEVGR <del>L</del> GPSDYFGEIALL <del>L</del> DRPRAATVVARG                                       | 250 |
| <i>A. mellifera</i>    | I <del>V</del> EGTAV <del>L</del> QR <del>R</del> SEG- <del>E</del> EPAEVGR <del>L</del> GPSDYFGEIALL <del>L</del> DRPRAATVVARG                                       | 249 |
| <i>C. capitata</i>     | I <del>L</del> DGTAV <del>L</del> QR <del>R</del> AEG <del>Q</del> DEPAEVGR <del>L</del> GPSDYFGEIALL <del>L</del> DRPRAATVVARG                                       | 250 |
| <i>A. aegypti</i>      | I <del>V</del> EGCA <del>T</del> V <del>R</del> QKRDEN- <del>E</del> EPAEVGR <del>L</del> GPSDYFGEIALL <del>L</del> DRPRAATV <del>I</del> ARG                         | 249 |
| <i>R. pedestris</i>    | I <del>V</del> EGTAL <del>V</del> LQCRGEG-DTAV <del>E</del> VGK <del>L</del> GPSDYFGEIALL <del>L</del> DRPRAATV <del>V</del> AKG                                      | 249 |
|                        |                                                                                                                                                                       |     |
| <i>A. amphitrite</i>   | PLKCVKLD <del>R</del> GRFERVLG <del>P</del> CADILKRN <del>I</del> QQYNSFVSL <del>T</del> V                                                                            | 287 |
| <i>H. sapiens</i>      | PLKCVKLD <del>R</del> PRFERVLG <del>P</del> C <del>S</del> DILKRN <del>I</del> QQYNSFVSL <del>S</del> V                                                               | 287 |
| <i>D. melanogaster</i> | PLKCVKLD <del>R</del> ARFERVLG <del>P</del> CADILKRN <del>I</del> TQYNSFVSL <del>S</del> V                                                                            | 287 |
| <i>M. rotundata</i>    | PLKCVKLD <del>R</del> ARFERVLG <del>P</del> CADILKRN <del>I</del> TQYNSFVSL <del>S</del> V                                                                            | 287 |
| <i>C. capitata</i>     | PLKCVKLD <del>R</del> ARFERVLG <del>T</del> CADILKRN <del>I</del> TQYNSFVSL <del>S</del> V                                                                            | 288 |
| <i>A. mellifera</i>    | PLKCVKLD <del>R</del> ARFERVLG <del>P</del> CADILKRN <del>I</del> TQYNSFVSL <del>S</del> V                                                                            | 287 |
| <i>C. capitata</i>     | PLKCVKLD <del>R</del> ARFERVLG <del>T</del> CADILKRN <del>I</del> TQYNSFVSL <del>S</del> V                                                                            | 288 |
| <i>A. aegypti</i>      | PLKCVKLD <del>R</del> ARFERVLG <del>T</del> CADILKRN <del>I</del> TQYNSFVSL <del>S</del> V                                                                            | 287 |
| <i>R. pedestris</i>    | PLKCVKLD <del>R</del> ARFERVLG <del>P</del> CADILKRN <del>I</del> TQYNSFVSL <del>S</del> V                                                                            | 287 |

**Figure S4. Amino acid alignment of deduced PKA $\alpha$  sequences.** The sequences were obtained from *A. amphitrite*, *Homo sapiens* (NP002725.1), *Drosophila melanogaster* (NP524189.2), *Megachile rotundata* (XP003707654.1), *Ceratitidis capitata* (XP004520213.1), *Apis mellifera* (XP006561792.1), *Ceratitidis capitata* (XP004520214.1), *Aedes aegypti* (XP001661170.1) and *Riptortus pedestris* (BAN20503.1).

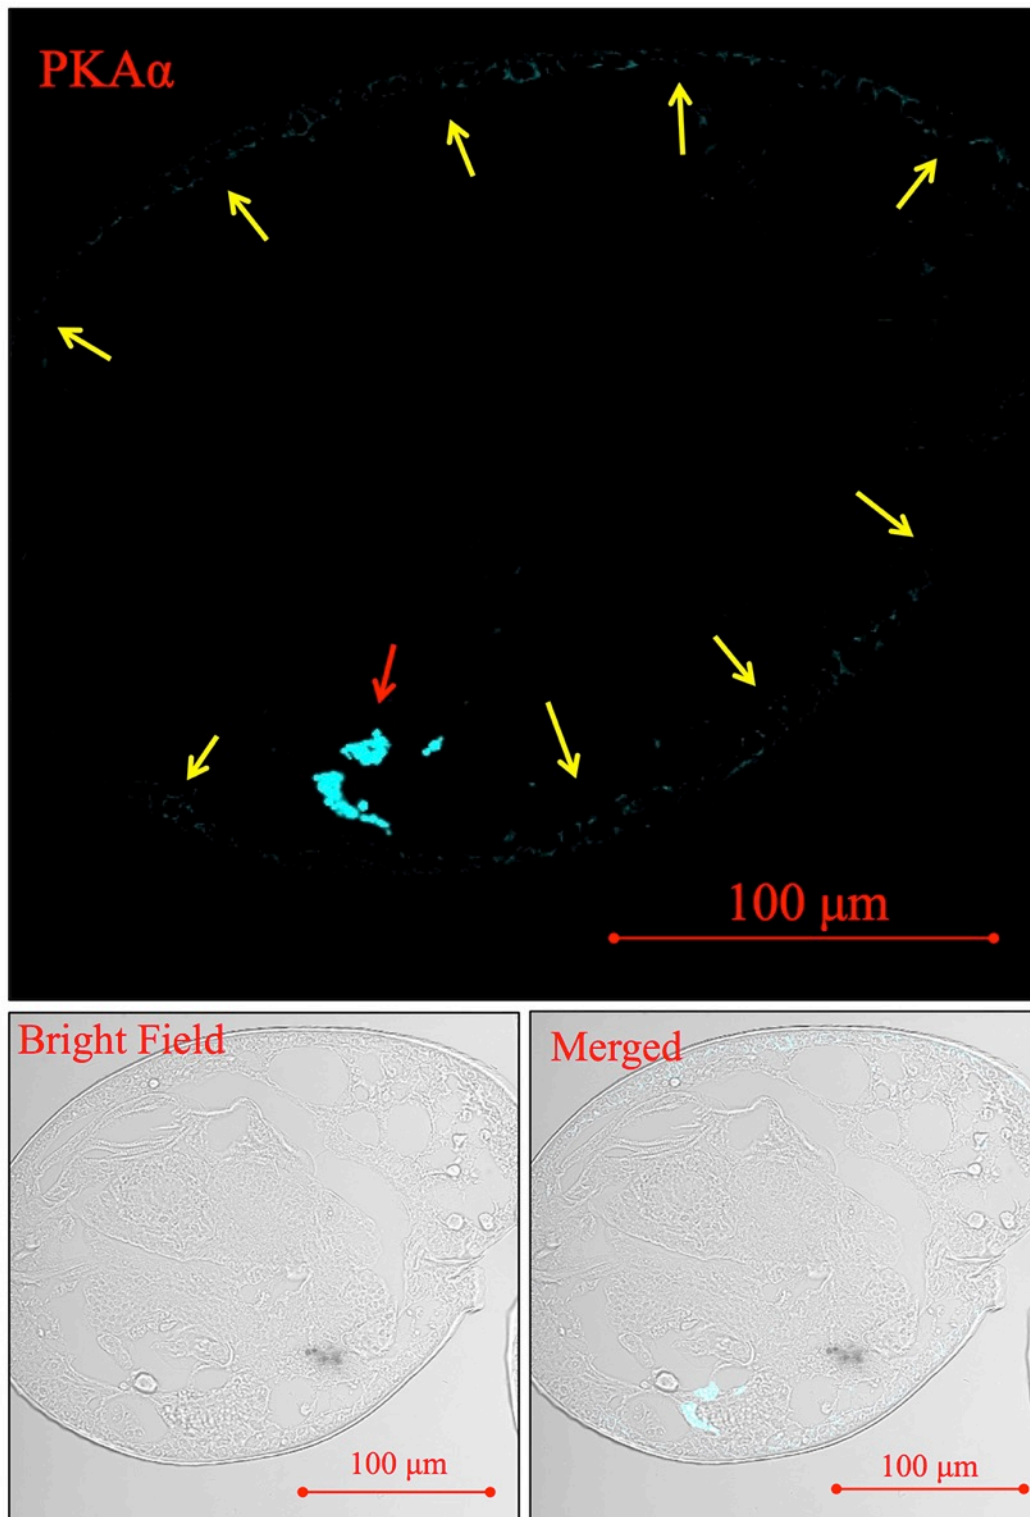

**Figure S5. Immunohistology of PKA $\alpha$  revealed weak signals in the cells of the body wall.** To better visualize the weak signal, the original red fluorescence (Alexa Fluor 594) is shown as light blue in the picture. The red arrow indicates the strong PKA $\alpha$  signal in the cement gland. Weak signals are shown by yellow arrows.

**Table S1. Spectral counts of proteins that were significantly changed in response to SB203580 treatment.** The spectral counts among three biological replicates are represented as the mean±SE.

| No.                                                                 | Contig                                           | Protein name                                               | Functional description                                                                         | Control    | SB203580  | P value |
|---------------------------------------------------------------------|--------------------------------------------------|------------------------------------------------------------|------------------------------------------------------------------------------------------------|------------|-----------|---------|
| <b>Energy production and conversion</b>                             |                                                  |                                                            |                                                                                                |            |           |         |
| 1                                                                   | Unigene23224                                     | glycogen synthase                                          | synthesize glycogen                                                                            | 9.3±3.1    | 24.7±3.1  | 0.0036  |
| 2                                                                   | CL7578.Contig1                                   | GG20479                                                    | NADH dehydrogenase (ubiquinone), produce ATP                                                   | 5.0±1.0    | 8.7±1.2   | 0.0241  |
| 3                                                                   | CL3129.Contig1                                   | Mitochondrial 2-oxoglutarate/malate carrier protein (OGCP) | transport of 2-oxoglutarate across mitochondrial membrane                                      | 10.0±2.0   | 15.3±1.2  | 0.0161  |
| 4                                                                   | CL6901.Contig1<br>Unigene11462                   | dihydrolipoyl dehydrogenase, mitochondrial-like            | pyruvate decarboxylation                                                                       | 1.3±2.3    | 6.7±1.2   | 0.0232  |
| 5                                                                   | CL1569.Contig1                                   | V-type proton ATPase subunit B                             | pump protons across plasma membranes                                                           | 79.3±6.1   | 62.0±7.2  | 0.0337  |
| 6                                                                   | CL791.Contig1                                    | Vacuolar ATP synthase catalytic subunit A                  | pump protons across plasma membranes                                                           | 93.3±7.0   | 65.3±9.5  | 0.0146  |
| 7                                                                   | CL593.Contig1<br>CL593.Contig2                   | AGAP006099-PA isoform 2                                    | Ubiquinol-Cytochrome C Reductase, generation of ATP                                            | 36.0±6.0   | 54.7±5.0  | 0.0145  |
| 8                                                                   | CL1.Contig245                                    | Arginine kinase                                            | maintenance of ATP level                                                                       | 150.0±21.4 | 102.0±7.8 | 0.0010  |
| 9                                                                   | Unigene11511                                     | Mitochondrial ATP synthase subunit g                       | Mitochondrial ATP synthase                                                                     | 5.3±2.3    | 0.7±1.2   | 0.0352  |
| <b>Secondary metabolites biosynthesis, transport and catabolism</b> |                                                  |                                                            |                                                                                                |            |           |         |
| 10                                                                  | CL15192.Contig1                                  | cytochrome P450 15A1                                       | drug metabolism                                                                                | 14.0±5.3   | 2.7±1.2   | 0.0223  |
| 11                                                                  | Unigene30671                                     | cytochrome P450 2P3                                        | drug metabolism                                                                                | 8.0±3.5    | 0.7±1.2   | 0.0254  |
| 12                                                                  | CL7151.Contig1                                   | cytochrome p450                                            | drug metabolism                                                                                | 92.7±8.1   | 73.3±8.1  | 0.0428  |
| <b>Cell cycle control, cell division, chromosome partitioning</b>   |                                                  |                                                            |                                                                                                |            |           |         |
| 13                                                                  | CL9561.Contig1                                   | GL10641                                                    | form the nuclear lamina                                                                        | 8.7±1.2    | 4.7±1.2   | 0.0132  |
| 14                                                                  | CL2695.Contig1                                   | Lamin-C                                                    | form the nuclear lamina                                                                        | 18.7±4.6   | 10.0±2.0  | 0.0406  |
| <b>Amino acid transport and metabolism</b>                          |                                                  |                                                            |                                                                                                |            |           |         |
| 15                                                                  | CL15271.Contig1<br>Unigene5261                   | serine proteinase-like 2a                                  | protease                                                                                       | 16.7±2.3   | 5.3±3.1   | 0.0069  |
| 16                                                                  | Unigene10435                                     | saccharopine dehydrogenase                                 | metabolism of the amino acid lysine                                                            | 1.3±2.3    | 6.7±2.3   | 0.0474  |
| 17                                                                  | CL11184.Contig1                                  | sluggish A CG1417-PE isoform 2                             | conversion of proline to glutamate                                                             | 1.3±1.2    | 8.7±3.1   | 0.0177  |
| 18                                                                  | CL16496.Contig1                                  | spermine synthase-like                                     | convert spermidine into spermine                                                               | 2.0±3.5    | 11.3±4.2  | 0.0405  |
| 19                                                                  | CL374.Contig1                                    | GI17616                                                    | serine-type endopeptidase activity                                                             | 16.7±1.2   | 0.0±0.0   | 0.0000  |
| 20                                                                  | CL6481.Contig1                                   | GH20777                                                    | serine-type endopeptidase activity                                                             | 10.0±4.0   | 0.0±0.0   | 0.0123  |
| 21                                                                  | CL7.Contig19                                     | CUB-serine protease                                        | signal transduction                                                                            | 101.3±9.5  | 72.7±11.4 | 0.0284  |
| 22                                                                  | CL1088.Contig2                                   | serine protease                                            | protease                                                                                       | 14.0±5.3   | 2.7±3.1   | 0.0325  |
| 23                                                                  | CL3.Contig27                                     | GA26108                                                    | peptidease inhibitor                                                                           | 29.3±1.2   | 0.0±0.0   | 0.0000  |
| 24                                                                  | CL3.Contig24<br>CL3.Contig30                     | GA26108                                                    | peptidease inhibitor                                                                           | 26.0±2.0   | 0.0±0.0   | 0.0000  |
| <b>Nucleotide transport and metabolism</b>                          |                                                  |                                                            |                                                                                                |            |           |         |
| 25                                                                  | CL6274.Contig1                                   | s-methyl-5'-thioadenosine phosphorylase-like               | methionine metabolism                                                                          | 6.7±3.1    | 0.7±1.2   | 0.0335  |
| <b>Carbohydrate transport and metabolism</b>                        |                                                  |                                                            |                                                                                                |            |           |         |
| 26                                                                  | CL17624.Contig1                                  | glucose-6-phosphate 1-epimerase-like                       | isomerases                                                                                     | 17.3±2.3   | 22.7±2.3  | 0.0474  |
| 27                                                                  | CL11285.Contig1                                  | Probable methylmalonate-semialdehyde dehydrogenase         | generate acetyl-CoA                                                                            | 11.3±9.2   | 30.7±6.4  | 0.0409  |
| 28                                                                  | CL4410.Contig1                                   | Phosphotriesterase-related protein                         | hydrolase activity on ester bonds                                                              | 8.7±2.3    | 0.7±1.2   | 0.0058  |
| 29                                                                  | CL992.Contig1                                    | beta-N-acetylglucosaminidase                               | degradation of glucuronic acid-containing glycosaminoglycans                                   | 75.3±4.2   | 9.3±9.0   | 0.0003  |
| 30                                                                  | CL304.Contig4<br>CL304.Contig5                   | epidermal retinol dehydrogenase 2                          | retinoic acid biosynthesis                                                                     | 7.3±1.2    | 16.0±3.5  | 0.0147  |
| <b>Lipid transport and metabolism</b>                               |                                                  |                                                            |                                                                                                |            |           |         |
| 31                                                                  | CL17009.Contig1                                  | methylmalonyl-CoA epimerase, mitochondrial                 | degradation of branched chain amino acids, odd chain-length fatty acids, and other metabolites | 1.3±1.2    | 7.3±2.3   | 0.0158  |
| 32                                                                  | CL4572.Contig1                                   | propionyl CoA carboxylase, alpha polypeptide               | fatty acid beta-oxidation                                                                      | 16.7±2.3   | 27.3±4.2  | 0.0178  |
| <b>Translation, ribosomal structure and biogenesis</b>              |                                                  |                                                            |                                                                                                |            |           |         |
| 33                                                                  | CL6243.Contig1                                   | advillin-like                                              | regenerative sensory axon growth                                                               | 11.0±1.4   | 6.0±2.0   | 0.0249  |
| 34                                                                  | CL6482.Contig1                                   | transmembrane protein 2                                    | multicellular organismal development                                                           | 35.3±6.4   | 20.0±5.3  | 0.0332  |
| 35                                                                  | CL11.Contig4                                     | Polyadenylate-binding protein 1                            | cytoplasmic regulatory processes of mRNA metabolism                                            | 17.3±1.2   | 14.0±0.0  | 0.0075  |
| 36                                                                  | CL14024.Contig1                                  | 60S ribosomal protein L34                                  | ribosomal protein                                                                              | 2.7±3.1    | 11.3±3.1  | 0.0255  |
| 37                                                                  | CL15766.Contig1<br>Unigene36236                  | S10e ribosomal protein                                     | ribosomal protein                                                                              | 42.7±5.0   | 64.0±2.0  | 0.0024  |
| <b>Cell wall/membrane/envelope biogenesis</b>                       |                                                  |                                                            |                                                                                                |            |           |         |
| 38                                                                  | CL4543.Contig1                                   | peroxiredoxin 6 protein                                    | regulation of phospholipid turnover                                                            | 6.0±2.0    | 0.0±0.0   | 0.0065  |
| 39                                                                  | CL2680.Contig1                                   | Transmembrane protein 69                                   | integral component of membrane                                                                 | 2.0±2.0    | 7.3±2.3   | 0.0390  |
| <b>Cell motility</b>                                                |                                                  |                                                            |                                                                                                |            |           |         |
| 40                                                                  | CL14396.Contig1<br>CL9899.Contig1<br>Unigene5067 | neither inactivation nor afterpotential protein C          | encode photoreceptors                                                                          | 15.3±2.3   | 4.0±3.5   | 0.0092  |

**Table S1. Continued**

| No.                                                                 | Contig                                       | Protein name                                               | Functional description                                                                  | Control    | SB203580  | P value |
|---------------------------------------------------------------------|----------------------------------------------|------------------------------------------------------------|-----------------------------------------------------------------------------------------|------------|-----------|---------|
| <b>Posttranslational modification, protein turnover, chaperones</b> |                                              |                                                            |                                                                                         |            |           |         |
| 41                                                                  | CL888.Contig1                                | Gasp protein                                               | control of myostatin activity;preventing myostatin proteolysis                          | 18.0±7.2   | 35.3±4.2  | 0.0226  |
| 42                                                                  | CL6240.Contig1                               | 60 kDa heat shock protein, mitochondrial-like              | protein import and macromolecular assembly                                              | 6.7±3.1    | 22.0±3.5  | 0.0045  |
| 43                                                                  | Unigene11234                                 | AGAP009694-PA                                              | protein folding                                                                         | 5.3±6.1    | 16.0±2.0  | 0.0453  |
| 44                                                                  | CL2410.Contig1                               | 14-3-3 protein epsilon-like                                | Adapter protein affecting various pathways                                              | 5.3±1.2    | 2.0±0.0   | 0.0075  |
| 45                                                                  | CL8957.Contig1                               | thioredoxin-dependent peroxide reductase                   | protects radical-sensitive enzymes from oxidative damage                                | 5.3±1.2    | 16.7±1.2  | 0.0003  |
| 46                                                                  | CL2356.Contig1<br>CL4955.Contig1             | glutathione S-transferase                                  | detoxification                                                                          | 0.0±0.0    | 20.7±7.6  | 0.0091  |
| 47                                                                  | CL4041.Contig1                               | glutamine:fructose-6-phosphate aminotransferase 1          | regulating the availability of precursors for N- and O-linked glycosylation of proteins | 0.0±0.0    | 5.3±3.1   | 0.0390  |
| 48                                                                  | CL14928.Contig1<br>CL16649.Contig1           | cathepsin D-1                                              | lysosomal aspartyl protease                                                             | 48.0±8.7   | 27.3±1.2  | 0.0152  |
| 49                                                                  | CL1199.Contig2                               | glutathione reductase                                      | resisting oxidative stress                                                              | 26.0±3.5   | 10.7±7.0  | 0.0275  |
| <b>Signal transduction mechanisms</b>                               |                                              |                                                            |                                                                                         |            |           |         |
| 50                                                                  | CL3558.Contig1                               | cAMP-dependent protein kinase                              | regulation of glycogen, sugar, and lipid metabolism                                     | 14.7±1.2   | 10.0±2.0  | 0.0249  |
| <b>Extracellular structures</b>                                     |                                              |                                                            |                                                                                         |            |           |         |
| 51                                                                  | CL3.Contig8<br>CL3.Contig20<br>CL3.Contig33  | dummy                                                      | gigantic extracellular protein                                                          | 16.7±3.1   | 0.0±0.0   | 0.0007  |
| 52                                                                  | CL3.Contig21                                 | dummy                                                      | gigantic extracellular protein                                                          | 19.3±8.3   | 0.0±0.0   | 0.0158  |
| 53                                                                  | CL336.Contig1<br>CL336.Contig5               | cuticular protein                                          | cuticular protein                                                                       | 30.0±3.5   | 11.3±1.2  | 0.0009  |
| 54                                                                  | CL1239.Contig2<br>Unigene4984                | CG42749, isoform C                                         | cuticular protein                                                                       | 5.3±1.2    | 0.0±0.0   | 0.0013  |
| 55                                                                  | CL888.Contig2                                | cuticular protein analogous to peritrophins 3-C5 isoform 1 | cuticular protein                                                                       | 18.0±7.2   | 35.3±4.2  | 0.0226  |
| 56                                                                  | CL21.Contig3                                 | chitin binding protein                                     | bind chitins                                                                            | 0.0±0.0    | 7.3±3.1   | 0.0142  |
| 57                                                                  | CL14958.Contig1                              | AGAP011936-PA                                              | chitin binding                                                                          | 0.0±0.0    | 10.7±2.3  | 0.0013  |
| 58                                                                  | CL8680.Contig1                               | chorion peroxidase                                         | shell formation                                                                         | 14.0±7.2   | 0.0±0.0   | 0.0282  |
| <b>Cytoskeleton</b>                                                 |                                              |                                                            |                                                                                         |            |           |         |
| 59                                                                  | Unigene25886                                 | Myosin heavy chain CG17927-PF isoform 3                    | Moysin component                                                                        | 22.7±4.2   | 8.7±2.3   | 0.0070  |
| 60                                                                  | Unigene15759                                 | Plectin-1                                                  | link cytoskeletons and different cells                                                  | 5.3±1.2    | 1.3±1.2   | 0.0132  |
| 61                                                                  | CL7850.Contig1                               | f-actin-capping protein subunit alpha-like isoform 2       | protect the growing ends of actin filaments                                             | 6.7±1.2    | 12.7±1.2  | 0.0031  |
| 62                                                                  | CL2450.Contig1                               | CBN-CYK-1 protein                                          | actin filament organization                                                             | 18.7±5.0   | 4.0±4.0   | 0.0168  |
| <b>Function unknown</b>                                             |                                              |                                                            |                                                                                         |            |           |         |
| 63                                                                  | CL2677.Contig1                               | HyTSRp1 protein                                            | unknown                                                                                 | 22.0±2.0   | 12.0±4.0  | 0.0179  |
| 64                                                                  | CL2236.Contig1                               | CG15449-PA                                                 | unknown                                                                                 | 6.7±2.3    | 1.3±1.2   | 0.0232  |
| 65                                                                  | CL7397.Contig1<br>Unigene5246                | GL15817                                                    | unknown                                                                                 | 12.0±2.0   | 20.0±3.5  | 0.0257  |
| 66                                                                  | CL9979.Contig1                               | AGAP005990-PA                                              | unknown                                                                                 | 12.0±0.0   | 8.7±1.2   | 0.0075  |
| 67                                                                  | CL7745.Contig1                               | MGC147117 protein                                          | unknown                                                                                 | 6.7±3.1    | 15.3±2.3  | 0.0173  |
| 68                                                                  | CL2357.Contig1                               | GA20276-PA                                                 | unknown                                                                                 | 9.3±4.2    | 0.7±1.2   | 0.0255  |
| 69                                                                  | CL2646.Contig1                               | Putative oxidoreductase yrbE                               | unknown                                                                                 | 19.3±3.1   | 38.0±5.3  | 0.0061  |
| 70                                                                  | Unigene34863                                 | C9orf68 homolog                                            | unknown                                                                                 | 10.0±3.5   | 20.0±2.0  | 0.0123  |
| 71                                                                  | CL74.Contig3<br>CL74.Contig5<br>CL74.Contig6 | AGAP004418-PA                                              | unknown                                                                                 | 31.3±2.3   | 23.3±2.3  | 0.0132  |
| 72                                                                  | CL14828.Contig1                              | AGAP006918-PA                                              | unknown                                                                                 | 3.3±3.1    | 9.3±1.2   | 0.0335  |
| 73                                                                  | Unigene9033                                  | unknown                                                    | unknown                                                                                 | 0.0±0.0    | 9.3±1.2   | 0.0002  |
| 74                                                                  | CL46.Contig1<br>Unigene11352                 | unknown                                                    | unknown                                                                                 | 18.0±2.0   | 1.3±1.2   | 0.0002  |
| 75                                                                  | CL1824.Contig3                               | unknown                                                    | unknown                                                                                 | 27.3±5.0   | 4.0±4.0   | 0.0033  |
| 76                                                                  | CL2298.Contig1                               | unknown                                                    | unknown                                                                                 | 60.0±2.0   | 16.7±14.7 | 0.0073  |
| 77                                                                  | CL1824.Contig2                               | unknown                                                    | unknown                                                                                 | 18.0±4.0   | 5.3±3.1   | 0.0121  |
| 78                                                                  | Unigene5401                                  | unknown                                                    | unknown                                                                                 | 184.7±16.2 | 144.0±5.3 | 0.0144  |
| 79                                                                  | CL166.Contig1                                | unknown                                                    | unknown                                                                                 | 109.3±16.0 | 76.7±7.6  | 0.0332  |
| 80                                                                  | CL4124.Contig1                               | unknown                                                    | unknown                                                                                 | 2.7±4.6    | 12.0±3.5  | 0.0488  |



## Appendix I: Protein sequences of the contigs involved in the present study.

>Unigene23224\_Ba\_mix

GRWLVDGNPQIILFDVGSASWKMNEMKDELWNLGIGIPNPDVECNDAVVFGYMVA  
EFLQQFRNRLPEFTDGPFRMVAHFHEWLAGVGLILARLRKIDLATVFTTHATLLGRFL  
CAGNTDFYNNLPYFNIDEEAGKRQIYHRYCMERASTHLCHTFTTVSEITGLEAEHLLK  
RKPDIIVTPNGLNVKKSALHEFQNLHALSKAKINDFVRGHFYGFDFNLDKTLTYFFIA  
GRYEFGNKGADIFIESLSRLNHLYKSSGSDVTVVAFMIFPTKTNNFNVESLRGHAVTKT  
LKDSIEDIQKKIGSRMFEICMTGRLPESTELLTREDNVRLKRCIYSMQRSCLPPITTHNV  
VNDGEDPVLRLRCHLFNDKSDRVKVVVFHPEFLSHTNPLLGM DYEEFVVRGCHMGVF  
PSYYEPWGYTPAECTVMGIPSMTTNLSGFGCFMSEHIADPMSYGIYIVDRRSIGLEDSIR  
ELAKYMYDFTRLNRRQRIIQNRNTERLSDLLDWRNLGIYYRRARQLALHAVYPEMAV  
SEEHGGRMSYPRPLSEPPSP TTSRSTTPAPSEIGSDDEVDDEEELLELAIKD

>CL7578.Contig1\_Ba\_mix

ISPQEKRLIEERNHRMKAQWQKLVSDPHSHKHGGYVFD PAMQRFMSMRVTQY  
ESFRPTLGNFFRGIGITAIPILLFAQLMHWRTRKEKEFSTGQVAYKDRLWK

>CL3129.Contig1\_Ba\_mix

QETSIPNYVKFIFGGSAGMAATMFVQPLDLLKNRMQMSGMGAAREHKTSFHFARAI  
VMKEGVRGMYSGLSAGLLRQATYTTTTLRGIYTELFERASKDGKPPFPFTKAAIAMVAG  
LVGSFIGTPAELCLIRMTSDGRLPEAERRNYKHAFDALFRVAREEGVTALWRGAVPT  
MGRAVVVNAAQVSYQAKQSLMSTGYFSDNIFLHFCSSMISGLVTTAASMPVDIAKT  
RIQNMKVVNGVPEYRGGLDVLAKVVRNEG VFALWKGFTPYARIGPHTVLT FIFLEQ  
MNKAYKKFVLHDT SAGG

>CL6901.Contig1\_Ba\_mix

DGSKEVIKTKNILIATGSEVTPFPGIEIDEDTIVSSTGALS LKQVPK KLV LIGAGVIGLELG  
SVWSRLGAEVTAVEFLGHVGGVGIDAEVSKNFQRILGKQGIKFKLGHKVTGAERSGDN  
ISVSVENVKDSSK KETLDCDALLVCVGRRPYTDRLGLEKMGIERDEKGRIPVNSRFQTV  
IPNIHAIGDCIHGPMLAHKAED EGIVCV EGIAGGPVHIDYNCVPSVIYTFPEVAWVGKT  
EEDLKADGVEYKVGKFPFSANSRAKTNQETDGFVKVLGDSATDRMLGVHIIGPGAGE  
MINEAVLAMEYGASCEDLARVCHAHPTCSEALREANLAAYCGKAIN

>Unigene11462\_Ba\_mix

DLVVIGSGPGGYVAAIKAAQLGLKTVCEKNETLGGTCLNVGCIPSKALLHNSHLYHEA  
VHEFKNRGIDVEGVKLNLEQMMNTKKKAVSGLTSGVAYLFKNNKVTHVKGHGTITGT  
NEVTATAADGSKEVIKTKNILIATGSEVTPFPGIEIDEDTIVSSTGALS LKQVPK KLV LIG  
AGVIGLELGSVWSRLGAEVTAVEFLGHVGGVGIDAEVSKNFQRILGKQGIKFKLGHKVT  
GAERSGDNISVSVENVKDSSK KETLDCDALLVCVGRRPYTDRLGLEKMGIERDEKGRIP  
VNSRFQTVIPNIHAIGDCIHGPMLAHKAED EGIVCV EGIAGGPVHIDYNCVPSVIYTFPE  
VAWVGKTEEDLKADGVEYKVGKFPFSANSRAKTNQETDGFVKVLGDSATDRMLGVH  
IIGPGAGEMINEAVLAMEYGASCEDLARVCHAHPTCSEALREANLAAYCGKAIN

>CL1569.Contig1\_Ba\_mix

MPTTLTPHQARTEHTMAITRDYISQPRITYKTVSGVNGPLVILEGVKFPKFGEIVNLTL  
GDGTDQRQGVLEVSGSKAIVQVFEGTSGIDAKNTICEFTGDILRTPVSEDMLGRVFNCS  
GKPIDKGPPVLAEDFLDIQGGPINPWSRIYPEEMIQTGISAIDVMNSIARGQKIPIFSAAG  
LPHNEIAAQICRQGGVLKLPKSVMDHSDNFAIVFAAMGVNMEAARFFKQDFEENG  
SMENVCLFLNLANPTIERIITPRLALTTAEFLAYQCEKHVLVILTDMTSYAEALREVS  
AAREEVPGRRGFPGYMYTDLATYERAGRVEGRNGSITQIPILTMPNDDITHPIPDLTG  
YITEGQIYVDRQLHNRQIYPPINVLPSLSRLMKS AIGEGMTRKDHADVSNQLYACYAIG  
KDVQAMKAVVGEEALTADDLLYLEFLTKEFKHFITQGNYENRSVFESLDIGWQLLRIF  
PKEMLKRIPASTIAEFYPRENK

>CL791.Contig1\_Ba\_mix

CGGERGNEMSEVLRDFPELTVEIGGQTESIMKRTALVANTSNNMPVAAREASIYTGITLS  
EYFRDMGYNVSMADSTSRWAEALREISGRLEMPADSGYPAYLGARLASFYERAGR  
VNCLGNPNREGSVSIVGAVSPPGGDFSDPVTSATLGIVQVFWGLDKKLAQRKHFPSIN  
WLISYSKYIRALDDFYEKNFQEFTALRTKVKEILQEEEDLSEIVQLVGKASLAETDKITL  
EVAKLLKDDFLQQNGYTPYDRFCPFYKTVGMLKNMIAFYELARHAVESTAQADNKIT  
WNVIRETMSQTMYLSSMKFKDPVKDGEAKIKADFEALHEEMQQAFRNLED

>CL593.Contig1\_Ba\_mix

MASKLMKSNILRSLPARRFAAQAATKSSDYGVLPREPLKTTTLPNGVVVASIENQSPLS  
RVAIAVRGGSRYETPDNRGATHLLRIVAGLTNAENTAFGLTRELQQLGASLACSADRE  
VLIYSADATRNHMDVVMELLANAATRQVFKPWEITDIKPHLKLVDVETTPAEVSLIEDL  
HLAAFRQSDLGNSVVPAPHLIGQLGPDQLASHLSRTLLAGRTAVCGTGIDHETLVEYA  
QGLQLPQGEPPAPAARYGGGELRTEIGGGVALVAVAAEGAGRSSATAAQQAVLQAVLG  
AGAVVKYAGRGVVGAAAAQAGGAAAALNAVYSDTGLVGYTVAAEADKAGQVIEAVN  
KAFKTTSLTAEDVNRGKALAKAAVLRADDNSGSCVETMGVQASLGKVS AVSDALAA  
IDAVKLSDVQTLHKRLVGGKLSMAARGNLRTVPYLDQL

>CL593.Contig2\_Ba\_mix

MASKLMKSNILRSLPARRFAAQAATKSSDYGVLPREPLKTTTLPNGVVVASIENQSPLS  
RVAIAVRGGSRYETPDNRGATHLLRIVAGLTNAENTAFGLTRELQQLGASLACSADRE  
VLIYSADATRNHMDVVMELLANAATRQVFKPWEITDIKPHLKLVDVETTPAEVSLIEDL  
HLAAFRQSDLGNSVVPAPHLIGQLGPDQLASHLSRTLLAGRTAVCGTGIDHETLVEYA  
QGLQLPQGEPPAPAARYGGGELRTEIGGGVALVAVAAEGAGRSSATAAQQAVLQAVLG  
AGAVVKYAGRGVVGAAAAQAGGAAAALNAVYSDTGLVGYTVAAEADKAGQVIEAVN  
KAFKTTSLTAEDVNRGKALAKAAVLRADDNSGSCVETMGVQASLGKVS AVSDALAA  
IDAVKLSDVQTLHKRLVGGKLSMAARGNLRTVPYLDQL

>CL1.Contig245\_Ba\_mix

SQPKDSKPAKSSNMVDAATMQKLDAGFQKLQAATDCKSLLKKYLTKEVYDSLKNKK  
TSFGSTLLDVIQSGVENLDSGVGVYAPDDEAYRVFADLFDPIIEDYHGGFKKTDKHPNK  
DFGDVSTVGNVDPEGQFVISTRVRCGRSMKGYFPNCLTEAQYKEMEDKVSSTLSGLD  
GELKGTfyPLTGMAKDVQQLIDDHFLFKEGDRFLQAANACRFWPTGRGIYHNNDKT

FLVWCNEEDHLRIISMQMGGDLGQVYRRLVNAATDIEKRIPFSHHDRLGFLTFCPTNL  
GTTIRASVHIKVPKLAADKKKLEEVAAKYNLQVRGTRGEHTEAEGGIYDISNKRRMGL  
TEYEAVKEMHDGILELIKIEKSL

>Unigene11511\_Ba\_mix

MAGVVAKLPAMGTNLVNAARPLATFLKYARVELTPPSPADVPAIQGLSNLVKSAR  
TGAWKNLTVKEATVNALVGAEVVFWFFIGECIGKGS�VGYQV

>CL15192.Contig1\_Ba\_mix

RPTNYPPGPPMFLIFGNLFETFRSLKGDPEVMVKEHRKKYGDIMAYIMPGNFKIVHLL  
NYDLIKESCARQEFSGRPSNFIVLYRSFQKKLGVILNDGPAWQEHRRFTLRHLRDLGFG  
TNSMETIILEEFEHLAKEMEQDMHSPMKVNQRFNLTVLNVLWRLVASKRLDRSEPEA  
KQRVKEVNDFTITGSPNPLSMFPFLRFISPNSFGLKELKNNRDNSLAMFQELMKEHR  
QTLDRAAPRDFIDRFLIEMESPDAARSFTDENLSIVCMDLFLAGMETTSTSLTWALL  
LLVMHPDVQTRVQQEIDAVLGVGADRRLPSYTDNANMPYTEATLQEVSRRTVVPRA  
VGHSAQDAPLGGYTVAKGSLVLMHLDVHMDPAYWGPDPDFRPERFINADGTV

>Unigene30671\_Ba\_mix

FGIGRRFCLGESLARMEMFVLFCLLQRFSAAPGQTLSESRVAAVRQPNEF

>CL7151.Contig1\_Ba\_mix

VVFFVLLVTYLWVTRPKRPPNFPPGPPTFLIFGNVIDLVRTASNDFQKHLNRLRSEH  
KSDIIGMVDVFGQPLVYVFGGELVKEAGNITELTGRPELFTVMYLSEMKRAGIFFNEGP  
LWQEQRRFALKHLRDLGMGKSVLNTMIADYALFAEHLKVVGVQEVKANNLFTVVL  
NIIWKMVASRRFDYDDPERQLQDIVTEFTQITGPQNILFLFPSARFVAPESSGFNKIK  
VYHSAMQGLFGPCIAEHRATLDP SHPRDFIDAFLIESQRPDAEKRGFDENLR TLCLD  
FFIAGSETTSLSMTWALLMVLYPDVQAKVQAELEVVGEGRLPSYEDRPRLPYTEAV  
MTEIWRYTSFVPLAVPHRSSVGAQLGGYTLPKDTTVMIHLSAHHDRGHWDPDV  
FRPERFIGEDGKFRKDDYFVPFGLGKRACLGESMARTEFFTLSCMLHQFHVRLPKGA  
KKPS

>CL9561.Contig1\_Ba\_mix

RTTMSTSSGSAATSPVRARSPHSPTRTSRLQEKEQLAGLNDRLAAYIEKVRNLELEN  
SRLTHQVRSSQEVVTREVSNIKSLYESELADARRLLDETAKEKAKLQIDLGNLKTERTD  
DLQSRLIRRELDNAEKKISMQDMQIRDQLGRLHQALQDKKKAQEELEEVQLENMK  
LKKQLDEVKQLESEALGRVDMENRCQSLKEELEFKTNVYEGQLTETRAKKTETTEL  
DGRLQEQEYVRLRESLQDLRDQYEAQMKANREEIEAIYNLKMDELRSQARNQLSTA  
TTLKELREMRRIEGLTGKI

>CL2695.Contig1\_Ba\_mix

SARMFKKTSTMSVSSGSAASPARSRSPSSPARTTRLEEKQQLAGLNDRLAAYIEK  
VRSLEAENNRSLQVRTSQEVVTREVSNIKSLYESELADARRLLDETARERAKLQIDLG  
NLKTERDDLAAKLVRRELEGAEKQVSLQEAQVRDLQGRLNQLADKKKAQDDLK  
DAQLENMKLKKQLDEVKQLESEALARVDMENRCQSLKEELEFKTNVYEEQLTETRS

KKTEEITELDGQLQSEYEARLRESLHELREQYEMQMRVNREEIETIYESKLEDLRAAQS  
RNQSSTATTRELRRETKARIDDLGKISDLEGTNTTLLARVRDLERQLDDERTSSASM  
LVAKNEEIERLQELMQQQLQEYQDLMDIKVALDVEIAAYRKLESEEARLNLSPGGRH  
VVEVSASSSARGSRATPSAGRAGKRKRMVLESEEAESTSGFAVANTCHGDVEIVDECAD  
GKFVKLRNKSNEVSLGGMQLVRKADGNETDYKFHRAIKLGAGEETTVWASEAGAV  
HDAPHSVMKGTWFVADKMTTTLYDMEGEEIAQRVSQRENRSASFTTSRQQVIAT  
GSEE

>CL15271.Contig1\_Ba\_mix

GACVPYYLCKDGDIVTDGAGLIDMRFGGDEDESKSNSQCPNFLDVFCRVPLTEPDPDI  
LGELTEYEYQPSCGHRNPEGVSIILDGFKEGESQFGEFPWMGILLEDELDDYDQVIQRY  
VCGCSLIHPQVIMTGAHCINGKDKPAKLTVRLGDWDTQNDKEIFPHEHHRVVDMEIHE  
RFNSANLRYDVGLLFLEKPVVLQQHIDTICLPAANEDFDLASC VATGFGKDQFHGGRF  
QNIMKQVDLPVPHRTCQNRLRETRLGRWFRHLHRTFTCAGGEAGVDTCRGGGSPLA  
CPSKEDPSKYVQVGIVAWGIGCGEDGVPGVYASVPKLVGWVNEKMAEHGIYTDLQV

>Unigene5261\_Ba\_mix

GACVPYYLCKDGDIVTDGAGLIDMRFGGDEDESKSNSQCPNFLDVFCRVPLTEPDPDI  
LGELTEYEYQPSCGHRNPEGVSIILDGFKEGESQFGEFPWMGILLEDELDDYDQVIQRY  
VCGCSLIHPQVIMTGAHCINGKDKPAKLTVRLGDWDTQNDKEIFPHEHHRVVDMEIHE  
RFNSANLRYDVGLLFLEKPVVLQQHIDTICLPAANEDFDLASC VATGFGKDQFHGGRF  
QNIMKQVDLPVPHRTCQNRLRETRLGRWFRHLHRTFTCAGGEAGVDTCRGGGSPLA  
CPSKEDPSKYVQVGIVAWGINCHQAGVPGVYADVVALMPWIRS

>Unigene10435\_Ba\_mix

RAYPMQAYINAGAQIKEDIGEASVIMGVKQVPIDALIPNKTYCFFSHTIKAQEANMPLL  
DAILEKNIRLLDYERMCDERGRVVAFGKYAGVAGMINIMHGMGLRLLALGHHTPFM  
HIGPAHNYRNSEMARQAVRDAGYEIALGMLPRSLGALTFVFTG

>CL11184.Contig1\_Ba\_mix

ADAAKLGPRDQLDLTFTDTRAAFQSKTTWEVFRGVLVYTLCTSRYLVEHNATLMKL  
FRKLLGQKLFHTVMRATFYGQFVAGADQASIRPQIENMRSFGVKSILDYSVEEDISTEE  
AEQAEMRSCSTPGEQEQLTVQKDPMARYHAHREFADRRVKVQSARTYFYMNEAQC  
EKNMETFLKSIEAVSGSTQCTGLAAIKMTALGRPQLLMQLSEVIMRTRRYLAELAGSE  
RATDVISQDVSVEQIQSRLKETS GPGVEQWLKGLTYDQDGLIHLFSWSGLIDTKTLM  
DLFRVPLTTGRMEPLITSLTKDEEEMFKNMMRRLHTIFSARECDVRVMVDAEQTY  
FQPAISRLTMELMRKYNREKAIVFNTYQCYLKEAYHNLSVDLDQADRQHFYFGAKLV  
RGAYMEQERYRAASLGYEDPINPTFEATSEMYERCLLETLRRIQHYKKGQPRKLAIM  
VASHNEDTVRFTVQKMDDELDIKREDKVVCFGQLLGMCDHVSFPLGQAGYSVYKYVPY  
GPIDEVLPYLSRRAQENKGI LTKVAKERKMLRSELLRRLVSGQLFYKPVGNYPV

>CL16496.Contig1\_Ba\_mix

MSFNNTLLDFSVAPEIITNPVASATLHQVVEEVGAVVPGLTRLIEDLLPSGGFHMTYT  
AENETFVTFRGRHSLVSVQIENYGETFLMENRAVVELEKRIRAKIGAHRGKAILPLKR

GRDIDSYFYTSDERLLEYGVLETIFDEVTPYQHVVVRRTRDFGKILVLDGFHNMSEKDF  
IYTETLMGGENYEGKTALILGGGDGLLCELLKQNPKFVTMVEIDEVVIRECRKHLRAI  
CGDCLDKFDGDNYKIIVGDAFQYLKDSVQEGRTFDYIFYDLSVVPVSPRHDRDLWNM  
VKDVLQDSMSLLPAGGKYMSHVMGVNCPAEEFERLVDELPAKTSRTSSSAYVPSF  
METWVVFYQVT

>CL374.Contig1\_Ba\_mix

GSTCDTPDGRSGVCLARSSCRWTRESSEDDFNSLVRTLGACVSTDSFSPRGEPVSRGVC  
CPGQGAASAPATTTARPPGGTQWWQTTWSPPPSATTTTTTTRRPATVPWWQQQP  
AASSQRTEPAGTTLHPPYITHAWQATRSTSRPPAAPHTPWQKPPGSTTVQSPTTTA  
WWATTTTTTRGTTTTTRRPTTTAWWATTATTKKPTTTAWWATTATTKGTTTTKRPT  
TTAWWATTTKSTTAAAPPASGGGGPYSCGTRDPEGSDRIVGGKQAVQGEFPWLAGIF  
KNGRQFCGGLIDEKHILTAHCVAHMSSYDVSQLLIRLGDYDVSTPFEAKHETYKVA  
RVVRHKGFFSEKTLHTDIALITLSKPVKYKSNIRPICLDSGVSARGAAGQTVTVAGWGLR  
EGGRQASIMQKVS LKVVWDNSKCRSTYGPSAPGGIISMLCAGRQKDCSCGDSGGPLM  
HISGVVYQVGVVSWGIGCGKAQYPGVYTRVSEMRDWIDRN

>CL6481.Contig1\_Ba\_mix

CGKTKFSTRIVGGTEPPAHAFWLVALQTRKRKKQFCGGTIINERFILTAHCVDRRK  
PTGLAIAVAKHKRRDDPTEKIFNVKNIKIHEKYNRATQDRDIAIHELTRSLRSMIADER  
GWVRPICLPRKTCRSENNCYTARSAILAGWGLLDSTFFEGPATVQYVKVPVLSNNQCQ  
ENYAKDRIGITRRMVCAGYPDGGKDCSCQGDSSGPMVVSADEVYTLAGVVVSGKGC  
LPGYPGVYVRVSEFTDWIRDNTR

>CL7.Contig19\_Ba\_mix

TDGDGDYSNNVDCYYQLYADQAGDQLSVTCSQFDVESHSSCAYDWLSVDGNKFCGSN  
GPSGVAIDQMAIHWHTDYSVVRSGFVCAVTVGEAPPPTTTAAPPPSDNCACGNVN  
RASRIVGGVQTEANEYPWQAGLVSTGGRTWCGGTVINSRYVLTAAHCTAGSSASRIQ  
VLLREHLINQDDGEIRFNIAQIKNHPNYNSGTYANDFLLKLATAITFPADNKIAPACL  
PTASNDFVGADAIVTGFGTTASGGSQATALREVTVPVISNSACQSAYSGYSITSSMVC  
GLLGTGGKDCSCQGDSSGPLVSLNRYSLIGVVSWGISCADPSYPGVYARVTDALTWIS  
TNAAD

>CL1088.Contig2\_Ba\_mix

RPDPPSTSREVTQCASQECVRPDLCDENGRITDGSGLLNARFNNREFCRTPGGGKGR  
CCLPADPEPQLVCGQSLDIRILGVTDPDSTEANFGELPWQAIISYTNITFCGGSLVGRQ  
HVVTAAHCVQSLQPGAIQVRLGEYRVNAEDEPLPHQDQGVSEIHIHPQYERGPLFYDL  
AVLRLSSPVQLDSHIQPICLPTPGQQTGRCVASGWGKDAFEGRFSTILKKVRLPMVS  
HEQCQENMRNTRLGSFFVLNKSFCAGGEEVDACKGDGGGPLACPSNGRYTLAGVT  
SWGIGCGARDVPGIYASAEAGLDFIRQHADS

>CL3.Contig27\_Ba\_mix

CPAGQECVQTRSGRVCRRDDSCRPKMSPGGCPGGSYCGQEGRCTPLLDVDAPCWSG  
VQCLHHVCRGHVCKLDACPQLDSDQDCPEGQFCSSSQRGNICINRRADGEACSSDAQC

QSYRCDGRRCSRDTCKTLLSRDGCPCDGHICQGGQHGNLCVPLLARGASCSSDRSCRSD  
SCRAGRCYEDLCPTPLDTAGCDFSLLCVHTLIGNECMTKLTIGADCTADLQCLSNFCDN  
NQCRRLAKNGDSCRFDNDCFSRNCFKGICRPSLASNGERCQFDDECFSGNCFRGRVA  
HREQ

>CL3.Contig24\_Ba\_mix

PGECQTPYSQSGCPYDQVCTADYRCVPLKPTGSRCRSEFECLSGKCRESRCVHDECLGE  
GFNSGCPAGQECVQTRSGLVCRPRDNNSCRPAMSAGSCPSGNYCGQEGRCTALLDVNAP  
CWNDVQCLHHVCRGHVCKMDACPQLDSDQDCPEGQFCSSSQRGNICIDRRPDGEACS  
SDAQCQSYRCDGRRCSRDTCKTLLSRDGCPCDGHICQGGQHGNLCVPLLARGASCSSGR  
SCLSDSCRAGRCYEDLCP

>CL3.Contig30\_Ba\_mix

PGECQTPYSQSGCPYDQVCTADYRCVPLKPTGSRCRSEFECLSGKCRESRCVHDECLGE  
GFNSGCPAGQECVQTRSGLVCRPRDNNSCRPAMSAGSCPSGNYCGQEGRCTALLDVNAP  
CWNDVQCLHHVCRGHVCKMDACPQLDSDQDCPEGQFCSSSQRGNICIDRRPDGEACS  
SDAQCQSYRCDGRRCSRDTCKTLLSRDGCPCDGHICQGGQHGNLCVPLLARGASCSSGR  
SCLSDSCRAGRCYEDLCP

>CL6274.Contig1\_Ba\_mix

IGIIGSGFSDPSALGVEDAKDVEYDTPFGKPSPLLTGTLGVPVAVLARHGRRHTILP  
SAVNYRANVYALRRHGCTHVLVSTACGLREEYRPGQLVLLDQFIDRTTKRPLTFFDG  
SCDEFVIGICHLPMADPFCGETRGVLGEAAKELGITMHDKGTIVTIEGSRFSTRAESHMF  
RSWGCDVINMTTVPEVTLGQGGG

>CL17624.Contig1\_Ba\_mix

MAAPTAVVVLDGRNNTTCTVNLHGATVVSWRVNNQEQLFVSKQAVFDGKKAIRGGI  
PIVFPHPGWSLGPQHGFARTSRWHLEKAPERLPSGDIEAIFVLMSEYTHQFWKHSL  
RLTYRLILREKELHFNIGVYNPLGSQDTFSFTLLLHTYFKCPDVRKCQVTGMHGCTFID  
KTRDGAVYQEGRDVVMINEWTDRIYQNTPEHIITNVVSGRKMRIQKFNLPDTPVW  
NPWEHKAKEIADFGDEEFPNICVEAGNVSTGIILPPNTVFEASQILQVM

>CL11285.Contig1\_Ba\_mix

LRLGQRFASVDTTKLFINGKFVESASSDWIDLHNPATNEVITRVPKSTPGEMQAAVDA  
AKTAFPTWSRSTVLTRQQIMFNFQNLIKKNMKVLAANITSEQGKTLADAEGDVLRLGL  
QVVEHCCSITSLQLGETMSDVSRDMDTLSFRIPLGVTAGITPFNFPAMIPLWMFPTAV  
VCGNTSVIKPSERDPGACMLLVQLLQEAGLPDGVVNVHGEHEAVNFICDSPDIRAISF  
VGSQAGKHIYERGSRNGKRVQCNMGAKNHGVIMPDANKENMLNQLVGAAGAAG  
QRCMALSTAVLVGEAKHWLPELVERSSRLRVSAGTEPDADLGPVISPKAKERIIQLVES  
GIREGAKCLLDGRAVKVPGYEHGNFVGPTILADV KPEMECYREEIFGPVLCVLTVDTL  
DAIELINNNPYGNGTAIFTTSGATARRFTHDIDVGQVGVNVPIPVPLPMFSFTGSRGSF  
LGDANFYGKAGINFYTQLKTVTQLWRADDVTHSKAATTMPVMR

>CL4410.Contig1\_Ba\_mix

MATTKGKVQTVLGLVEPSSLGVTMMHEHMHLDFNVAFIPPEGKYAHKADCDFTLEN  
SGWIRQNPYASRQNVTFCDAAVDAAMRDELRTYRENGGGAVVEVTNYGIGRDAALLA  
AYSRTAVTIVTGTGFYQHMFQLESDLALTVEEMHDRALKDITDGCPEAPLVKAGVIG  
EVGSGWPIHDFERRAIQAAALGQQATGCPVNFHPGRDPAAAPEVLRIFQEAGGDVSN  
IMSHLDRSIQTAEGLSEFAKIGSYLEFDLFGIETSHYTLAPHVDMPSDAQRIQRIKHLVE  
DGYEDRVVISHDIHTKHRLTKFGGHGFSHILENVVPMMKVRGLTEETINKILSTNPQA  
AMTFK

>CL992.Contig1\_Ba\_mix

LTFPWMWECREGACL RTPVSEATNGMTLGGCKLTCGKGLTLWPKPTGTFTLGKTPV  
SFKYSQVIVIVDAPQDVRGHVEKAGNRLKETLRDMRPPGGSCLELSSASDANLATRQL  
TIRVTVEQSDASLTLKTDESYKLNITHTDADQLEAHIEAKTFFGARHGMETLSQLVAY  
DDANDALMTVTADVRDAPVYPVRALTLDTSRNFISVAGLRRTIGAMAMNKLN TLHW  
HITDTHSFPIEITGEPRLAQYGAYSPREVVYTRAEVEELVQFALERGVRLPELDMPAHV  
GYGWQWGEKAGMGNLTVCLGKEPWQQFCVEPPCGQMNIINENLYKVLKTLVEYND  
VFQPDFLHIGGDEINLNCWKTTPEIAAFVKEKGGDPTDDEEYMKLWIQFQERVYDM  
WTSIAGEQKTLWTSHLTQRPAEESRLDPSKYHIQIWTGKDQQIGDLLKQGYELILSN  
YDAWYLDCCGSAWVGKGNWCSPIKSWQTVYENS PRKIAQSFQSNDAASQPASQ  
SDFSAQILGGSAAWTEQADDANLDNKLWPRGAALAEERLWAEPETDSLAAQWRLVH  
HRRRMVARGVHAETMQPKYCHQYDGTCTYI

>CL304.Contig4\_Ba\_mix

METVLNGLLCVAQALFLWLQSVVLFVPAKYREKSVSGDVALITGAGSGIGRLLALRLA  
KRGARIVTWDVNAEGNEETVRQIRAAGGEAHAYTCDLSNREVIYKTAERVKREVGKV  
TILVNNAGMVTGKPLLDIPDNLIEKTFEVNTLAHFWTCKAFLPDMMIAKKGHVVNIA  
LAGLQGMGRLLTDYCASKFAAVGFHESLTVELKVGHEGVKTTVICPFFINTGMFDGAK  
SNIIPFLEPEYVAERIEQAILLNEEQVLIPGYLAALFYLLKAMPWRAYWTLGLAFKVER  
AMDTFTGRTKQ

>CL304.Contig5\_Ba\_mix

METVLNGLLCVAQALFLWLQSVVLFVPAKYREKSVSGDVALITGAGSGIGRLLALRLA  
KRGARIVTWDVNAEGNEETVRQIRAAGGEAHAYTCDLSNREVIYKTAERVKREVGKV  
TILVNNAGMVTGKPLLDIPDNLIEKTFEVNTLAHFWTCKAFLPDMMIAKKGHVVNIA  
LAGLQGMGRLLTDYCASKFAAVGFHESLTVELKVGHEGVKTTVICPFFINTGMFDGAK  
SNIIPFLEPEYVAERIEQAILLNEEQVLIPGYLAALFYLLKAMPWRAYWTLGLAFKVER  
AMDTFTGRTKQ

>CL17009.Contig1\_Ba\_mix

DSGVPKALWKLGRNLHVAIATPDLKKSTALFRDVLGADVSEPEALPEHGVRTVFINLG  
NTKLELLHPLGPDSPITNFLDKNPSGGMHHICIEVDNIAEAVASLQQKQIRCLNEPRPG  
AHGKPVVFLHPKDCAGVLVELEEA

>CL4572.Contig1\_Ba\_mix

DKIQSKLAIDAGVNTIPGFEGEIRDVDHCVAVSREIGYPVMIKASAGGGGKGMRIARN

DDEAREGFRLSQQEAAASSFGDDRILVEKFVDCPRHIEIQVLADQHNNNAVYLNERECSIQ  
RRNQKVIEEAPSVFLDEETRRAMGQQAVALARRINYSSAGTVEFLVDSARNFYFLEMN  
TRLQVEHPITECITGVDLVQQMIRVAKGHKCLKQEDIPIRGWAIESRVYAEDPFKNFG  
LPSVGRLSKYIEPNHLPGVRCDSGVAEGSDISIYYDPMICKLVAYGNSRQEAIARSLDAL  
DSYVIQGVTHNIPLLRDILTEPRFVSGDITTNYLPEVYPDGFQGHRLEGESLLRLAALSA  
VIHVKHTQRSSLVSGHHALQPVATKWDLVV

>CL6243.Contig1\_Ba\_mix

GDVFLDAREAVYVWTGKEANHMEKIQAAKTAQSIKDDHGGADIIVVESGKENEMSK  
NEKALFNKLLPLSDRSVRPASAAPSDDKQERRVAEDIRLYRCSDEDGALKVTEVKGGP  
LLQSDLDKNDTFIIDNGEQIWWVVGRRATHKERAEAMRNAQGFIKKKNYSQATPVT  
RVIDGGEPDFKSLFQSWRDKDATTGLGKKATIGQVAKTIQTSFDASTLHEHPDLAAH  
TQMVDGDTGKKEIWRVEFDLKPVPDVKYKFFSGDCYVILYTYHARGREEQIIYYWL  
GSHSAQDEQGTAAALKTVELDDSLGGRPVQVRVVQGKEPPHFLAMFGGRMVVYSGGVS  
SAFESAEGVNGGHNATVGDYLLQVRGTTNYNTHAVQVDCRAGSLNSNDCFVLRHGG  
EVFVWCGKGATGDEREMAKTIAAEMHSEPQIIYEGQERDDFWAKLGGLEPYASSPRL  
AEADQMOPARLFQCSNASGRFLVEEIPDFIQDDLVPDVMMLLDWNTIFIWIGSGSNK  
TERERAEKTAIEYLRTPAGRGVGTPIVRVKQGCEPPTFTGFFGVWDDGLWESQPDW  
EAVRRDVSAGNKGISEVTVAAAKAVELPVYELETLRQHDPPELLPEDVDPSIKERYLAPE  
VFEELFGMSRDAFSALPTWKQQQLKKKVDLF

>CL6482.Contig1\_Ba\_mix

CPHEGTLKSWSDAASWASGTVPAEGEAVVSEPMMLDTATPDLLSVTVEAGGRLVFD  
PAADLAKLAAEWIKVAGELHVGAEPCPFTGQAEIELLGKKNVTVGQVHEHGAEFKA  
LVVVDGGRLEVHGQPRQAWTRLQTTLPTTRELVVGDALFNHRETEVAHWYRGF  
MGYQFNSTGQPVRMRLRRSCDFSDLVTMQGSVLLVVQRKVELDRDQQLEHAADA  
FEQVCYGGGQRSHLRDLSLGETVAWAAICHVGHPEPENTIEELGHPEGDNSVTSRLVKQV  
GDVEYLAQSVTRLTSDWPYEIDMLTYTAGNVPDAHIVLDVSSNVSDWRAGDTVAITS  
TDYDWRQAEFTLLDCPDCSATQIMIGWPVRWTHWGETTDGVNMGAEVGLLNRNV  
RIHGRMEDACYGDNHCGRFNFDTFGGQIKVFANFASVRIVNAEIFHMGQNSVLGAYPI  
HFHMCGDVTTRELRAYVRSNAIHHTFARCVTVHGTSGLLVEGNMAYDHFHGCFFLE  
DGSEKRTVFRNNLGFSTRRTTLTPSDHGRASTFWITNPLTTMEGNVAGGSEGWGIWY  
TFPRKPIGSAALDVMENHNEAMKTPLDPFIDNVAHSNNEYGLHFDGVLRSNGHIHG  
FNYDPREDPLNATSPTVVVTLTGFTAFAKKNYKSVWLRMSRVVAKRFNIAESVEGVVFA  
WSGAGEKRLEDVSLVGETANKGRPEGWIRLTNGTSIWWDRQIRMNGADNALPIIGVIF  
HDTIMSLNRVTFDRFESNIVRPSGGIGMRRKIRHYTSPVNSVSGLVFRYADPLEGNRAF  
DASEGRGFADLAGNIQNVIRDLGSLTTYANSTVVKPYDIHLNARCAPVPQWNLYVCP  
TMFTKLLFMWWDRSVGNLNTFLTRNDGSATFTYGVNFQNSYALNSQEGYIVHFNTS  
VPRYFKIRLAGVEAGVVQTVGLCIGKGVTPLTVMNSVPVPSFDSLDDQGADVHWYL  
DTEAGVLFFRFSSPYHRTADTVDECPGQDGKPAAGCEVLVVLPSNTDGDSCGRAYPA  
YS

>CL11.Contig4\_Ba\_mix

MNSAGPNYPMASLYVGDLPDVTTEAMLFKFKSTAGPVLSIRVCRDMITRRSLGYAYV



NFQQSADAERALDTMNFVVKGRPIRIMWSQRDPSLRRSGVGNIFIKSLDKSIDNKAM  
YDTFSAFGNIMSCR VATDENGVS KGYGFVHFETEKAANDAIEKVNGMLLNDKKVFG  
KFVPRKEREKELGEKAKRFTNVYVKNFGEDLDDTKLLEMFEPFGTISSHKVASGEDGK  
AKGFGFVSFEDPEAAEKAVNEMNGKEINGKTIYVGRAQKKAERQHELKRKFEQIKLER  
MNRYQGVNLYVKNLDDGIDDERLRREFAQFGTITSARVMMEDGRSRGFGFVCFSSPE  
EATKAVTEMNGRIVSSKPLYVALAQRKEDRKAHLASQYMQRMTSMRMPGVNPMFQ  
AGAGGYFVPTMPQAAQRFYPPAQMAHQMRPGPRWQQPAGGQMRLLGGQAAGGMPA  
PFRGQAQRAAGGQAPAGGMQAGQTRPMAQQALLPAGMQPRPMPAQGAAGQ  
QPRPAYKYTANMRNLQQLSAAGVSGQAPLMPGAAQALAMQQPAVRVQGGQEPLTAS  
MLAAAPEQEQQMLGERLYPMIQRMYPELAGKVTGMLLEIDNSELVHMLEHHESLK  
GKVDEAVAVLQAHQAKATPA

>CL14024.Contig1\_Ba\_mix

MVQRLTYRRRLSYNTRS NRVKVVKTPGGRLVYHYRKKPRRVPRCADTGKKLTGIRSA  
RPQEKKRMKRKHKT VNR TYGGVLCHSAVRERIIRAFLVEEQKIVRKVLKAQQASAKA  
K

>CL15766.Contig1\_Ba\_mix

MLMPKKDRVKIYEYLFKEGVMVAQKNPHRPRHPNVPVPLYVMKALQSLKSRGYVS  
EQFAWRHYYWTLTNEGITYLRDFLHLPSEIVPATLKRPTRAETARPRAAAPRPDGGK  
MEGDRAAYRRVGE GGPDKKGEAGAGAGQMEFRGGFGRGRGMPQ

>Unigene36236\_Ba\_mix

MLMPKKDRVKIYEYLFKEGVMVAQKNPHRPRHPNVPVPLYVMKALQSLKSRGYVS  
EQFAWRHYYWTLTNEGITYLRDFLHLPSEIVPATLKRPTRAETARPRAAAPRPDGAK  
TEGDRAAYRRAGE GGPDKKGEAGAGAGQMEFRGGFGRGRGMPQ

>CL4543.Contig1\_Ba\_mix

MVVLGEVFPNFEAESTEGHIRFHDFIRGSWCILLAHPSDFTPVCTTEMGAAKMAPAL  
LRRGVKMACISCDPVSSHKTWIEDIRAYNGLSGPFPFPIISDEERQLAKKLG MIDPDE  
PRFDNKPATARAVFIIGPDLRLKLSMLYPGTTGRNF AEIQRIMESLLVTAKHKVVTPEQ  
WQVGEKCFVVPFLSMEEAKDMFPAGVQVHPVPSGKQYLRTTPMP

>CL2680.Contig1\_Ba\_mix

KCFYLPQVLURSL SLLGRMSALS VLRCLAAAGRPPALCSPRLLPPAGRTVWRGPAAHS  
RALVVLDDLRLQPQSPRALLLGAAGLLPFAAAPVLMMLRTGHFSAELLHAQLAYGACI  
LSFLGGVRWGVTL PDGAPQRPDWANLTRSVTPSLLAWAGLLAPPSAGGLMLIGGLL  
AGYWDMVMYGYPAWFKALRFCLSVGAILSLWTAL

>CL14396.Contig1\_Ba\_mix

EGLLALLDESTLSEKASDQYFVENCKETIESRHHFFPEKDGFAIAHYAGKVSYSNKDIVA  
KNKDYLDPEVFDTLRQSENPFIA PMFLLPLTKTGNLTM DREQAQREAGGKARPVKLN  
DDVGNKRFDTRS RGRLSQTSLVLLTQASCYRYSAMEVMHKLINSTAHFVRCVRSNSEG  
AADTWD TGLVAHQKCMQIANTIAIRKDGYSQRIDFAEFLRRYQFLAFDFDETVEVTR

ENCRLLMVRLKLDGYRMGRQKIFLKYFNEEYMSRLYEHEVKKIAKVQAMIRAFLVRR  
R

>CL9899.Contig1\_Ba\_mix

EGLLALLDESTLSEKASDQYFVENCKETIESRHFFPEKDGFAIAHYAGKVSYSNKDIVA  
KNKDYLDPEVFDTLRQSENPFIAMFLLPLTKTGNLTMREQAQREAGGKARPVKLN  
DDVGNKRFDTRSRGRSLQTSVLVLLTQASCYRYSAMEVMHKLINSTAHFVRCVRSNSEG  
AADTWDGTGLVAHQKCMQIANTIAIRKDGYSQRIDFAEFLRRYQFLAFDFDETVEVTR  
ENCRLLMVRLKLDGYRMGRQKIFLKYFNEEYMSRLYEHEVKKIAKVQAMIRAFLVRR  
R

>Unigene5067\_Ba\_mix

EGLLALLDESTLSEKASDQYFVENCKETIESRHFFPEKDGFAIAHYAGKVSYSNKDIVA  
KNKDYLDPEVFDTLRQSENPFIAMFLLPLTKTGNLTMREQAQREAGGKARPVKLN  
DDVGNKRFDTRSRGRSLQTSVLVLLTQASCYRYSAMEVMHKLINSTAHFVRCVRSNSEG  
AADTWDGTGLVAHQKCMQIANTIAIRKDGYSQRIDFAEFLRRYQFLAFDFDETVEVTR  
ENCRLLMVRLKLDGYRMGRQKIFLKYFNEEYMSRLYEHEVKKIAKVQAMIRAFLVRR  
R

>CL888.Contig1\_Ba\_mix

ALGVPALGQAGFECPDQLPGFFPHDVSCDKYWACEEGVATLKTGNGLAFDDTDPNY  
EKENDYLHNVQCGQRTELEPPISSPNCPRQYGFIDEANCNTFWSCWAGEANKYEC  
PPGLAYDSEQRVCVWADQVAACKSEKEGDFQCPAEGNGLGTYSLYAHQEDCRLYYV  
CMGGAPREYGCPLGTVFKIGDLGSGQCADPADVPGCEEYYGDVDIRALRALGF

>CL6240.Contig1\_Ba\_mix

MYRIPGLLRGPAARQLTRCFAKDVRFGDVRASMLQGVDVLADAVAVTMGPKGRNVI  
LEQSWGSPKITKDGVTVAKAIKELKDKFQNIQAKLVQDVANNTNDEAGDTTTTATVLA  
RAIAKEGFEEKISGANPTEVRKGVMLAVQAVVANLKNMSKAVTTPEEIAQVASISANG  
DKTIGDLISSAMKKVGRDGVITVKDGKTLHDELEVIEMKFDGRGYISPYFINSSKGAQV  
EYQDALVLLCEKKISNIQQIIPTELEANTARKPLVIAEDVDGEALTTLVVNRLKIGLQV  
VAVKAPGFGDNRKNTLQDMAIATGSIVFGDEASTIKLEDVQLSDLGQIGEVQITKDDTL  
MLKGRGNKTDIEQRCVQLKDKIEETNSEYEKEKLQERLARLASGVGVKLVGGSSEVEV  
NEKKDRVTDALNATRAAVEEGIVPGGVALLRSATALSALQPANEDQKTGVEIVRRAL  
RMPLQTIAANAGVDAAVVVARVQDAQPEIGYDALNDEMVMNMMERGIIDPTKVVRTA  
LTDAAGVASLLTTAEAVVCELPKEDKADAMGGGMGGMGGMGGMGGMGGMGGMGGM

>Unigene11234\_Ba\_mix

MASLNPVHVLRRGAAEEKAEIARLSSFVGAIAIGDLVKSTLGPKGMDKILISVGRSEGKV  
EVTNDGATILKNIGVDNPAKVLVNMSCVQDDEVGDGTTSVTVLASELLKEAEKLVG  
MKLHPQNIAGWRRATDIARKALAGSTVNHGSDPKFRNDLMNIARTTLGSKILAQH  
KDFFAELAVNAVLRKSSGNLQAIQVLKVQGKTLRDSFLDEGFILNKKIGVHQPKRME  
NAQILIANTPMDTDKIKVFGSRVKADSTARVAELEVAAEKEKMKDKVEKIVKHGINVFI  
NRQLIYNYPEQLFADAGVMAIEHADFDGIERLALVTGGEIVSTFDHPELVKLGSKVIE

EVFIGEEKMIKFSGVPLGEACTVVLRGATQQILDEAERSLHDALCVLTSTIKETRTRTVFGG  
GCSETLMAVAVLEEAARTPGKEAVAMEAYARALLQLPTIADNGGYDSALLVSQLRAG  
HTQGQNRLGINMLDGTVGNMEELGITESFMVKQQMVASASEAAEMILRVDDIIKAAP  
RRRVDDRGC

>CL2410.Contig1\_Ba\_mix

EREDSVYKAKLAEQAERYEEMVEAMQTLACLDVELTVEERNLLSVAYKNVIGARRAS  
WRIISSIEQKEETKSAEEKLEMIRSYRIKVEKELKDKCGEILQLLDHSHVIPSATTEESKVF  
FHKMKGDYHRYLAEFATGNERKDAEAENSLAYKAATDIAMTELPPHPHRLGLALNF  
SVFYEILNSPDRACRLAKAAFDDAITELDRLSEENYKDSTLIMQLLRDNLTLWTSDM  
QTDGKEGEAGTGEEAPAVQDVVEEQDVA

>CL8957.Contig1\_Ba\_mix

AIPFRMLASSASRLLRGLSASVRPVRLSRTAPALAPRVQQPAPDFKQAVVDGEFRT  
VQLSDFKQYLVLFYPLDFTFVCPTeltaFSDRMDEFRALNTAVVGVSTDSQFSLA  
WIDTPRRSGGLGGLSYPLSDFSKAIAREYGVLEDEGVALRGLFLIDPSGVLRQMSVN  
DLPVGRSVDETLRLVRAFQFVEEHGEVCPANWQPGGATIKPSPAESKEYFEKV

>CL2356.Contig1\_Ba\_mix

MGIDIYAIKPSPPCRAAFLVAKAIDLKIVSLEKGENRTPEFLKMNPAHTVPVMTD  
GELSIGDSKAIITYMMNQYAPANLQSLYPRDPAARALVDQRLYFDSQLFASLRGIVFPL  
VFMKDLKQSQANMPRVNENMALLETLTRSTYLAGEHLTIADLATLANVSSVEAGGL  
DMSRWPHVQAWLAKLKAELPYEQANGEGAQMMGAMYKNALKE

>CL4955.Contig1\_Ba\_mix

MGIDIYAIKPSPPCRAVFLVAKAIGLDYNLKIVDMEKGENRTPEFLKMNPAHTVPVMT  
DGELSIGDSKAIITYMMNQYAPANLQSLYPRDPAARALVDQRLYFDSQLFASLRGIVFP  
LVFMKDLKQSQANMPRVNENMALLETLTRSTYLAGEHLTIADLAMLSNVSSVETGG  
LDMSRWPHVQAWLAKLKAELPYEQANGEGAQMMGAMYKNALKE

>CL4041.Contig1\_Ba\_mix

MCGIFAYLNHLTPKDRKEVFQILIQGLQRLEYRGYDSAGVGVGDKDGSIEIYRAKGKVK  
NLEDLIMSEDNKQDMSEILKTHVGISHTRWATHGVPAPVNAHPQPSDASKQFICVHN  
GIITNYKDIKQFLIAKNHVFESSETDEIISKLTLMYRDHPNHTFQQIVELVIQQLGAF  
ALCFKSVHFPNQVVAARRGSPLLVAIKTKEHLATDHIPIIMYSKEDFKGENTKSRKISPA  
DARHVPAGTHGGNVPLIPRTESTAEFLPTGDSQEIEYFLASDASAVIEHTNRVIYLED  
DVAWIRDGMLSIHRLKRESMDECSTREVHTLMEIQEIMKGSFSSFMQKEIFEQPEV  
VNTMRGRINFEDETIVLGGIKDYLPKRCRRLILACGTSFHSAIATRQLLEELTELPV  
MIDLASDFLDRKTPIFRDDVCFISQSGETADTLMALRYCKSRGALIVGITNTVGSICR  
ESHCGVHINAGPEIGVASTKAYTSQFISLVMFALVVSEDRLSMLPRRREIIQGLKVLPEL  
IKEVLALDSKIEELATGLKGARSMVMGRGYNATCLEGALKVKEITYMHSEGILAGEL  
KHGPLALVDPGMPVILICTRDPTYVKCMNALQQVTAREGRPILICSKGDTEPARFSNAL  
LEIPHAVDCLQGLLTVIPLQLLSYHLAVLRGCNVDCPRNLAKSVTVE

>CL14928.Contig1\_Ba\_mix

LLVACLGAIQAKMHITLKTCKDAPEQNPNTPKEDAPSFHVQLLKNIAKAGVQTFVGE  
ISLGTTPQLMSVSVETSSALSYPFVSRVEDQFCKTRRQYNSSASSTYEALGTPFELPPGI  
NASGVLKDSISFAGITVEGVVFGAEESMWNKWLSILPPDGVGLGLQGMPEGVPRPIL  
DVMAEQGVISERVFGMWLGRDPQGGELTLGGLNDQLYRGELTWANLTPPDGQWWT  
APADSIVLDGLTQLDLCPGGHCVVLPASNSPYFIVSEAQAAINEALGGLDIGQPGAAGL  
DCTTLYRLPNLTITVGGGRAMVGLPLEYTFLLRFEGGLQMCVSGFLGFPVDDHTMLLG  
TLFMQKYYIAFDRENNRLGFADSA

>CL16649.Contig1\_Ba\_mix

LLAACLGAIQAKMHITLKTCKDAPEQNPNTPKEDAPSFHVQLLKNIAKAGVQTFVGE  
ISLGTTPQLMSVSVETSSALSYPFVSRVEDQFCKSRRQYNSSASSTYEALGTPFELPPGI  
NASGVLKDSISFAGITVEGVVFGAEESMWNKWLSILPPDGVGLGLQGMPEGVPRPIL  
DVMAEQGVISERVFGMWLGRDPQGGELTLGGLNDQLYRGELTWANLTPPDGQWWT  
APADSIVLDGLTQLDLCPGGRCVVLPASNSPYFIVSEAQAAINEALGGLDIGQPGAAGL  
DCTTLYRLPNLTITVGGGRAMVGLPLEYTFLLRFEGGLQMCVSGFLGFPVDDHTMLLG  
TLFMQKYYIAFDRENNRLGFADSA

>CL1199.Contig2\_Ba\_mix

ISGVDCLLFAIGRDPNVELDLDKTGVTLEKGHKIVDAFQNTSAPGVYALGDVCGRALLT  
PVAIAAGRRLAHLRFDGKTDLKLKDYNNIPSVVFSHPSPGSGVGLTEREARDKFGDAAVR  
VYRSSFAPLYYALSERKVKTHMKLVCAGDEQRVVGLHMVGQAVDEMLQGFVAVKM  
GATKAQFDDCVAIHPTSAEELVTMR

>CL3558.Contig1\_Ba\_mix

EVPPQLEDLLEFTVNVLVNQPDNLVAYAVEYFTRLNESGNKYSGANSKLAPADTNN  
VQDGGVSDQDDSMSEDEGPPQNCNYRRKSVFAEAYNPEEDDDEGQKAVFPKSDEQ  
RARLSDAVQGILLFRALDPHQMQEVIDAMFERKVTAGENVIQGDDGDNFYVIESGRY  
SIYVKMDDSAEPKKVGSYDNKGSFGELALMYNMPRAATITADEEGSLWAMDRQTFR  
RIVLKNAFKRRKMYESLLETVPMLKALEPYERMNLADALVPRTFTDGEIIEQGDEA

>CL3.Contig8\_Ba\_mix

GSGRVCRRDDSCRPA MSAGNCPSGSYCGQQGRCTPLLDVNAPCWNDVQCLHHVCR  
GHVCKMDACPQLDSDQDCPEGQFCSSSQRGNICIDRRPDGEACSSDAQCSYRCDGRR  
CSRDTCKTLLSRDGC PDGHICQQGQHGNLCVPLLARGASCSSDRSCLSDSCRAGRC

>CL3.Contig20\_Ba\_mix

GSGRVCRRDDSCRPA MSAGNCPSGSYCGQQGRCTPLLDVNAPCWNDVQCLHHVCR  
GHVCKMDACPQLDSDQDCPEGQFCSSSQRGNICIDRRPDGEACSSDAQCSYRCDGRR  
CSRDTCKTLLSRDGC PDGHICQQGQHGNLCVPLLARGASCSSDRSCLSDSCRAGRC

>CL3.Contig33\_Ba\_mix

GSGRVCRRDDSCRPA MSAGNCPSGSYCGQQGRCTPLLDVNAPCWNDVQCLHHVCR  
GHVCKMDACPQLDSDQDCPEGQFCSSSQRGNICIDRRPDGEACSSDAQCSYRCDGRR

CSRDTCKTLLSRDGC PDGHICQQGQHGNLCVPLLARGASCSSDRSCLSDSCRAGRC

>CL3.Contig21\_Ba\_mix

CGKSQICVHTLIGNECMTRLPLGAQCTSNLQCLTNICRDNHCRRPLAQNGDRCRADND  
CLSRNCRRTGTCRPPPAQDGDRCRSNKDCLSRNCFKGTCSPPGTGGGSRCSNEDCLL  
GFVCSQGICSQLGGDGDGFCRGNRECQLDLVCLDGICGPPRTADNDGRFCQFNNDCLL  
LVCISGICSETGGEGGICQLNSDCLLGFSCLDGLCVGDGDGGGGDGGTVDVDTLLGIG  
EQCFAAIECFSGRCAGGQCAEPLLGIGDDCSTAESMPSNALCR

>CL336.Contig1\_Ba\_mix

GVTDNQYRYIDAEGTVRTVKYWADTPSLRSSGAHTPHSPQLRMAAPAPAPVQDTPEV  
AAAKAQFMATFRMAQQGVIPAPVQDTPEVAAAKAEFMAKFRAAQRAQRKRRSVTVG  
LSHTPASTALLP

>CL336.Contig5\_Ba\_mix

GVTDNQYRYIDAEGTVRTVKYWADTPSLRSSGAHTPHSPQLRMAAPAPAPVQDTPEV  
AAAKAQFMATFRMAQQGVIPAPVQDTPEVAAAKAEFMAKFRAAQRAQRKRRSVTVG  
LSHTPASTALLPGAYWKWSPLY

>CL1239.Contig2\_Ba\_mix

GAMIPVLLLVLVGHVAGHGRLMDPPARNAMWRFNFSNPVNYNDNELFCGGFVVQY  
QQNDGKCGVCGDNYALDEPRPHEAGGEFAKGLIGKRYSPGQLIDIEVELTANHMGNFV  
IRLCPHNDRKTVTQECLNKHVLRVAGTNSIRYVIPEDSGKAGIFRWKVELPPYLTCT  
QCVMQWTTYAGNTWGTCSGDGEQAVGCGPQETFINCADIAIVSNTPYFGPVHNSLDRT  
LPLTKSEVARVVQEDLDNEPRAPAFRPQICLPHGEFKQEEGADRFLRCMVNPEACPT  
DRCMCVTECEAQGEFAKRPQADLFCHECLGFP SHCPEDKCRCF

>Unigene4984\_Ba\_mix

LVRHAAGHGRLMDPPARNALWRFKGPVNYNDNELYCGGFVVQYEQNGGKCGVCG  
DNYASETPRPHEAGGEFANGVITRRYAPGQIIDVEAELTANHKGNFVIRLCPNNPNE  
TVTQECLNKHVLRLAGSKAIRFVIPEDSKKSETFRWKVELPPYLTCTQCVMQWTTYA  
GNTWGTCSGDGEQAVGCGPQETFINCADIAIVSNTPYFGPVHNSLDRTLPLTKSEVARV  
VQEDLDNEPRAPAFRPQICLPHGEFKQEEGADRFLRCMVNPEACPTDRCMCVTECE  
AQGEFAKRPQADLFCHECLGFP SHCPEDKCRCF

>CL888.Contig2\_Ba\_mix

ALGVPALGQAGFECPDQLPGFFPHDVSCDKYWACEEGVATLKTGNGLAFDDTDPNY  
EKENDYLHNVQCGQRTELEPPISSPNCPRQYGFIDEANCNTFWSCWAGEANKYEC  
PPGLAYDSEQRVCVWADQVAACKKSEKEGDFQCPAEGNGLGTYSLYAHQEDCRLYYV  
CMGGAPREYGCPLGTVFKIGDLGSGQCADPADVPGCEEYGDLDVKELAMRALGGG  
SGTSG

>CL21.Contig3\_Ba\_mix

RRFLCVVALAVVVADASSVRERRQALRKKDSAKLEELCRDRGDEYFRLEDENDCKVV

YRCTRGGLKRIQCPDGLAFDIRQQTCLWKRHVKNCDLLSKERKVLPLLKTDEPLCPVD  
QLACGSGDCIDSFLFCDGQPCADKSDENACEVGVDPNGSFLCDTSQCLLPSCFCSSDG  
TQIPENLEPAQTPQMITMTFTGAVNVDNINLYQEIFRDERQNPNGCTAKGTFVSHKY  
TNYSAVQELHRKGHEIGVFSITTNDDPSYWSDSYEIWRDEMAGARDIENFANITDG  
TVAGVRAPQLRVGGNNQFAMMIDQQFVYDSSITAPYGRVPIWPYTLDYQMPHKCLGT  
SQNCPSQSHPVWEMVINELDLRENPEETERLPGCHLLSSCASINNPEQFAKILRNNFE  
HHYSTNRAPFGLHLTADWLQNNKGFINELIKFIDEMQAKNDVYFVTESQVISWMQAP  
KETNAIRDFDDWKLKCEVKGLPECSIPNACLTTRELPGDNFYLNTCMECPKNYPWI  
KDYTGNGFA

>CL14958.Contig1\_Ba\_mix

MQLAAALVVLLAVSANGLRVQRQDAEATEDEAVQAICLGKGPGEWFRLNAGSASCNV  
VVQCTSAGLQKIKCPHGLAFDLNKQACDWKDTVSDCDQTRPKLVLPRINTDEPLCA  
TQDELACGDSTCIARSLFCDGKPCADSSDENICDAESDPNRAPPCDPAQCQLPSCFCS  
ETGNQIPGGLAPEQVPQMIMITFNGAINNNNIDLFDDLFSRSLNPNNGCPMKGTFVVS  
HKYTNHTAVQDLHNRGHEIGVFSITQNDTANYWTNASTEWAREMAGQRYIIEQFAG  
IADNSVVMRTPYLVRVGGNNQFSMMDDQTFLYDSTITAPLGDLPYWPYTLNKMPPH  
CHGNAQKCPTRAFPVWEMVMNELDRREDPRIDNLPGCAQVDSNINLNGEQFYNF  
LNHNFRHYLTNRAPLSLNFHSAWLKKGDFLDYLLRWIEDIQISVTDVYFVTMTQVIE  
WMQEPLDVQQTKFASWLTKCDESTGFECTKPGGSNCALHTDGVAGTFNMQTCRC  
PPNFPWLNDPSGKGYF

>CL8680.Contig1\_Ba\_mix

LDRIPGCTLPEQPACQPREKFRRMNGECNSDAEPRLGRAQTAFSRFFPAEYEDGIWQP  
RSKALSGDPLPSARLVSERVVRTTPVMDPWSSLSVMQLGQILNHDIISTAAFTLENGG  
GLFCCNRDNTMPAEPLHPLGCNPIVPADDPWYAQFGRTCMNQVRSLPAPFENCIAG  
PTGQLNQVTHFLDLSTVYGSSDTDMRRLRLNAGGLFKMSEGNLLPQSGGRFISGEGRL  
SENPGLAFMHTVWVWTRHNRVANTLSRLHRHWSDEQLFQEARRIVIGEYQHIIYNEYL  
PVILGFKYTREHGLDPEFGHSFSYTNVIDPRVTAEFSTAAFRFGHAQIPDVFLMTQNG  
MNLTAIAMEDSFFREDMLKLPNFMNTLATTLTRQKQRMVDNTFSPAVHEKLFASGQ  
PSGLDLIALNINRGRDHGLPGYATVLENCLERTLSGGWDEMSEFFEPDVLRLRAVYQ  
SVFDIDLYIGGVSEKKVPGALVGPFAFQCIIGEQQFATRYGDRYFYDNGDMPHSLTFTQV  
REIQKASWARILCDNVEDVNMQLAFFAPNPLFNAVRHCRSFAIPTVDLRAF

>Unigene25886\_Ba\_mix

GAVKGLKDKLLLSGSRDYHFVSQGKTTIPGVDDKEEMEATDEAFDILGFTQQEKENI  
YRIVAAMHLGTMKFKQRGREGAEADGAEEGERVAKL

>Unigene15759\_Ba\_mix

VSQHHPAGSTVEAYLAAMQTQWSWILQLTLCLETHLKHAQLSHKLFKDVEDMTRVI  
NQQDDRLNSEFSRSEFTLDDGEQLLRDMQLLRDAMAQQAEIERLERRAQQATPLRQ  
RRHPDTGVRLTTICNYK

>CL7850.Contig1\_Ba\_mix

ISDQEKVRIVSDFILHSPPGFNEVFNDVRHLINNDNLLKEGASGAFVQYNKDQLTPVR  
LPGSDYPAFITDFNDLGGSRFFDPRTKQSFRFDHLKKEASDLKPHEGDSTAEPWRRAL  
EAEMTAYTADHYKNGACAVFGHSNDGDVTLVACIEDHQFQPKNFWNGRWRSQWTV  
TIPSSGTAQLKGVLVQVHYEDGNVQLVSSKDAADGAVVASESQTAKEVRLIETSE  
NDYQTAICENYQTMSETTFKALRRQLPVTRCKIDWKGKIIQYGIGRELKQQ

>CL2450.Contig1\_Ba\_mix

PPTTEAPPTTAAPTAAPEGGSRSSPVAGGPPPLGGSRSSPVAGGPPPPGSRSTPMAGG  
PPPPMPGSRSTPMMSGPPALPESPKTPTVGIADPDFVIPDDIDLPLDLPPYDPNFFF  
DYPPEPLPDTYLIDLILPPEQPDWPPP

>CL2677.Contig1\_Ba\_mix

REQGGKHQDGVYWFTGMPVPVYCDFSHDGGGWTLTLLTAVSADGWDALSALGRSRRS  
PTLTDNYSILAHADAIRDLGHSARFAYRIEAQVETGRQRWGGVWLAPRHYSFIHESPS  
QTDVTIVRKFDWEYKDIGIEKRMPWLSTDSAHDVLTTSASVSVEWWGTLVSHKT  
HTYYKHSPWLNGE

>CL2236.Contig1\_Ba\_mix

LKLLQIALCLTCLGLIRNYGLAFGGSSGDALNRQLVGHACGGMVLVTAPLLIALVAGEI  
AIEKSFLETLYNVVGFIMMITAGIMAVEFYNSFGSSETRDAGLAMGSLAINAIYLVDAF  
VAFR

>CL7397.Contig1\_Ba\_mix

LRLSTSPSCGSESDGWLSKLLVRKIEPTKESHSRMLSDKEVIYELQTHNVRGEMDK  
VPSTTTAATTARWPSGRPPASWPRSWSAAGRSPWATRTSASTCGSTTADTRPVDDA  
RNAHIDDKSLAALVKERGTLRLRARHSQYLLAFSFWPAPAPRSGKHLYEIRSYLLKPGT  
MIEWGNNWARAIHFRREGDEAFAGFFSQVGRLYNVHHLWCYDSMAHRKEIRETAW  
RKPGWDECVAYTVPLITNFQSRIIVPTPFSPTR

>Unigene5246\_Ba\_mix

RLVSSLGLRLLSTSPSCGSESDGWLSKLLVRKIEPTKESHSRMLSDKEVIYELQTHNVR  
CGEMDKYIDNYGRYHGEVAERTAAGQLAQELVGSWEVTVGDQDQCIHLWKYNGGYK  
AVDDARNAHIDDKSLAALVKERGTLRLRARHSQYLLAFSFWPAPAPRSGKHLYEIRSYL  
LKPGTMIEWGNNWARAIHFRREGDEAFAGFFSQVGRLYNVHHLWCYNDLQHRKET  
RESAWLRPGWDECVAHTVPLIGGMQSRIMWANPFSPTQ

>CL9979.Contig1\_Ba\_mix

DSKFDIGLVLASFKKCGEDTGGSLTMDDYIAGYVELNKFFGLLGTVFGFVGSVDVHQLV  
QLECLRKGGASDSYVTVERMILYEKQNGVFESDKAGNGCRTLLRLHRALAFIADFLRE  
LHRSDEQKMGVCQASYKRTLAVHHPWLQVQGGALLAMHMLGTRGDIVEKAVGGDS  
SDKEKHKDTLLECIDVMQAVYADTQKLYEQH

>CL7745.Contig1\_Ba\_mix

VVTGCSRGIGLAMVSELVKNFVKVFATCRNPASASQLSGLLTSLEQPAVALDVTDEA

SIQAAYGTVKEAAGRVDLLINNAGISVKTHPVDPCETAQLSELNRLLETNVGGLVRVTQ  
VFLPLLRRASPRRVVNISLLGSIGVCKER GALAPDHFFSYRISKAAGNMATVAMSTAIT  
EVEFLAVHPGWVATDMGNSSGRTADITVEESAEGVVREALRPQRRTGEFVDWRGNP  
VPW

>CL2357.Contig1\_Ba\_mix

LKYAVGLAPSDPDSQPVMILGQIRHLARVSWDTIKVKLEPQVSEAVWQRAVSELPSP  
TDSLHLYLNQATLAALPGKCSRHNTPSRAHSVTRLVRSLLTGADQTVVLCERADML  
ATGCAVARALPLFTRKSGPQPEPTITVEVLVVDGEQASAEVQLMQDAARGIRLTARL  
VDT PANEMHTDAFVEEVKKVGEELGVSLTLIRGEDLKARGFGGIYGVGKAAVHPPALA  
ILSHTPAGATQSIWVGKIVYDTGGLSMKTKTTPMGMKRDLGGAAAILGAFLVTVKA  
GFTQNLHAVFCLAENAVGPIATKPDDIHTLYSGRTVEINNTDAEGRLVLADGVAYANK  
DLKCTTILDMATLTGAQGTATGKYHGALLTNEDTWEVLGAAAGRASGDLLFPVYTP  
ELHFSEFASSVADMKNSAADRSNALVSCAGLFIAANLGFDFPGSWIHV

>CL2646.Contig1\_Ba\_mix

FSRPSPYLDGARTQHVSDFKYTRYQNQINGSVPTGAAGATDSVKVERRTKIVDKKTIGI  
ALYGLGRAGVIHLGNLMINPRVSLVYTLSDQARYDAMKERWGD RMPPNVLPADSGT  
VLADPRVDAVMVATPTHTHFDIIQQALLADKLVFSEKPIGENEQQARRCYQLAEQRGL  
SVFCAFNRFRDPALQTVRSGVRRGDVGVVHTIKTVARDSPLPSIDFLRQSGGIFHDCAV  
HDIDLICWILGQFPLRVLASASAHVPEIAALGDHDTAAIVMEFEGGTIGSIDLSRNAVY  
YDQRTEVFGPGLLTAGNERPVNVHHLTSGGETAVPFYFSFPSRYSESYANELDSFLDY  
VQGKIPLPIRPEDSLRVSQIASACEESLRTRAFVELDY

>Unigene34863\_Ba\_mix

RSQKVEILLDIQSVRSPDAWVPCNGAIYLSICLLGQYIRTKDKAPIFPINFNETFVVEKVF  
GHVFRLADLDDMLDAEVVYLELIQRPPAGPDTVLASFETSARELLFP

>CL74.Contig3\_Ba\_mix

DADKQSGDVTCMRFHNGKLYTGAEGGKLIVYNPDLTIYKTMQAQFNTINAICFFQGDL  
VTTGNDGLIKVWDSSSLELKKTLEGHENEVRVLKARDDKLFSGDMNGKVKIWDKNY  
TMLFTLSVVEEVWSMDMARDIYTARCNDVTCTQIGFKEMSVPGETKFIILDTFEGRG  
PMCIAGEHIIYTNREGTVLLVKENKPGHKHVNNMTGHEKIINALIYTDNLVYSAGYDG  
MVKIWDGTTYKPVASGTTVGPNPVFSLGVGDNGEVYAGLNDGSI

>CL74.Contig5\_Ba\_mix

DADKQSGDVTCMRFHNGKLYTGAEGGKLIVYNPDLTIYKTMQAQFNTINAICFFQGDL  
VTTGNDGLIKVWDSSSLELKKTLEGHENEVRVLKARDDKLFSGDMNGKVKIWDKNY  
TMLFTLSVVEEVWSMDMARDIYTARCNDVTCTQIGFKEMSVPGETKFIILDTFEGRG  
PMCIAGEHIIYTNREGTVLLVKENKPGHKHVNNMTGHEKIINALIYTDNLVYSAGYDG  
MVKIWDGTTYKPVASGTTVGPNPVFSLGVGDNGEVYAGLNDGSI

>CL74.Contig6\_Ba\_mix

DADKQSGDVTCMRFHNGKLYTGAEGGKLIVYNPDLTIYKTMQAQFNTINAICFFQGDL



VTGNDGLIKVWDSSSLELKKTLEGHENEVRVLKARDDKLFSGDMNGKVKIWDKNY  
TMLFTLSVVEEVWSMDMARDIYTARCNDVTCTQIGFKEMSVPGETKFIILDTFEGRG  
PMCIAGEHIIYTNREGTVLLVKENKPGHKHVNNMTGHEKIINALIYTDNLVYSAGYDG  
MVKIWDGTTYKPVASGTTVGNPVFSLGVGDNGEVYAGLNDGSI

>CL14828.Contig1\_Ba\_mix

MPVTLDTYLPSEQELTVEELNIGYPALKAGSFHLGKYCEAQRDEFMLCRQEEKDPRKC  
LAEGRAVTSCELEFFRKVKSTCLDEFNQYANCLDRGSPDLKFRMCRNTQSVFDKCVQ  
DNMGMERPYGYFCAPKVIRTNRPRPAPEPPLEFPNTPDELPTMPRKPAPY

>Unigene9033\_Ba\_mix

XGLVQQISNQAMYQYGAEAAACYSGQRLYEESCGELLRSPGFENWSYENRIIDGSVVPQ  
HRDIQTD

>CL46.Contig1\_Ba\_mix

TQKNALEVHSPHCKYKADESRLILLSDPQRKKRSAPEAPAEDQQADAAMFYRSYR  
YPAFGYTYPGVRILKKRAADPEKEEEDEKKKVVYINAMPYSSLGYPFYSYAPYIYKK

>Unigene11352\_Ba\_mix

XNHNSSQLTMKCVLLFAVWSCASAYYFVTPSAYYGGVSPYIWRKKRSAPEAPAEDQQ  
ADAAMFYRSYRPAFGYTYPGVRILKKRAADPEKEEEDEKKKVVYINAMPYSSLGYPF  
YSYAPYIYKK

>CL1824.Contig3\_Ba\_mix

XSMPQPASTGGLSYAVQNLGGYVIVNNEAVPVGFSATQPSGDWKS LGQMSVSACL  
GTCYHGDGLFMMVQTVDGVTSWSSSSVDMGQLSQTVPSPAGAYEVFDISSMRIGSQ  
MAVSHSSGFVVKSTAANKGYTDFDVTMPDKEESSELTIIYTSAPSSLQLFPMSEGHP  
AECVASAMGMMCDVAIWNPSDPEKPCQCGQLINGGPLGLTDTSPDVAGYMEVIQLR  
AMQPPADFEGLSYTMYDLFAGYFRLIVNYKALAVRFSGSEPAGNWKNLGHLSVSECL  
DACYQGDGLFMMVQTMNDVTSCWSASLVDMSLLSREYPSGPGEYEILDISP MKIGSEN  
TVTHSNGLVVTSTGIQNGYRAFTVTMPGTSFPELTVYYTSAPSSLRLLPVSSAQPAK  
CVSSATLMLCDVAVWDPNNSDMPCQCCEIVEGETLGLTDTSPD TVGFVEVIQLIPMP  
PPDVEPGHASFQSFWMTPVEYRLILNGEIIPASFARSAAVQAAAGVNLDR AIVKEACAT  
TCFGLHYNGAALSHQTCRCLEDPSSVSSQQYVAGDDLVS LINFAKYQPKPDGSSSTIT  
LQVPGTRYGRFLFGNAVLPCGFTPQNVDPSTGPPGSWKDAGERTGLRDCASECSKLQL  
NFGAMLPLGKNIFKCWCAESVDMSAFSTAMPEVGGRAQILDFTDVIRGISSRLQIRHV

>CL2298.Contig1\_Ba\_mix

XLQSQAWRRLPAVPPLFCLQMCALRGYTYAAVGNSEDPTCDCSKRSPNEADLFRTAK  
TDSDRQVFFLKGLPRIGKMSLVYVTENSFLQFIFSGTSAARPIVLYLRSAPPAGWTFRL  
PSGGDSFPQKYRLLAYCPLMCRAQGFYAAVRFQPAGECCLGPAEVD AVRSDTSSSPD  
GASPDSTIQIIQLGSLQGSAFPKE LLVLDRTSSGDQWSFSPRWITISIRLGAGLQGSLELE  
GQTRS SVSLASGIPIKTPPVFIDASMAAIPKGFNIRGRLRISR DAGFFTS DLSQLSGQWQ  
TVDAERNAECPQKCLEAGFSYAAMQTQTKRGWCKCALQLQNIDKYARRDSVKTGDIQ

VISLRRIGEKQLQVARLAELHRQAAIKAYKMIMQNPKWYRQVTVVSVPRTYGQNIGIA  
SNPASCFCGCATSNFNAYFYTVYGCLCSNDKSDVKVVRPRYRSLKYFAAGRTSLFYIGR  
VNRLKPSGTA AVIKGRKGYLILRSPNGRVQTGRFMAASLLQSQA WRRLPAVPPFLCLQ  
MCALRGYTYAAVGN SKTQH VTAQELHQILLFRVWRS DSKQVFMLSGLPKAGKMT  
SVTVMRGSFLQFTFSGT SAARPIVLYLRSAPPAGWTFRLPSGGDSFPQKYRLLAYCPLM  
CRAQGF PYAAVRFQPAGCSCLGPAEVD AVRSDTSSSPDGASPDSTIQIIQLGSLQGA AIP  
KELLVLDRTASGDQWSFX

>CL1824.Contig2\_Ba\_mix

XLINDGPLELTDTSVPRERGSLEVIQLRAMPP LAGELTAISYSVFEFIASYYRVIVNNDIV  
PAGFSVSQPAGAWTSLGQMTISECIDTCSRES DFLMVRTVDNVTSCWSAPLVDMSLL  
RQQFPSVSGEYQVLDLSVMKIGTKITVTHSAGFNVSSTGIKNGYRGYAVKMPDESE PSE  
LTVYYTKSAPSSLQLFFMTEHYPGNCVASAMGMMCDVAIWNPSESEKPCQCGQLING  
GPLGLTDTSVPDVAGYMEVIQLRAMQPPADFEGLSYTMYDLFAGYFRLIVNYKALAVR  
FSGSEPAGNWKNLGHL SVSECLDAC

>Unigene5401\_Ba\_mix

PDQYAALIDDQSSNLTDPTVSAALDKSRQAQSMSTSSISSIRDGLYEGQSKLLVEIRDAL  
GGSPSGKNLDDVITTMNALHNDLMH SVGTLVTAMSDTNAALQTIISKMDGGSKQDPF  
REIGLLATDRPLHSGDPDTGAMYDCTFD DAAAYENLNRAIGIIRSTRTDPDDVVVIRF  
SGVGLSIYMGDTAPPHSPDIWLTPVDRAATIGADSQMMIMLSTYTKQLGHDSL YKFI  
VWGGGFMSLLRAVATNPNVAARVSIQKLGHLIANXACVNDCFFENLCTLFSNCRLSGC  
SACLRVIVPAMVKRGRRGGSPSRGRGRVSTIVIPLDREDHATDGAGNAILPANNTVYAA  
VTGEHILSAAPT VNGVRPSYARIRKITLDTTTGAALTTAGMGYYQAWRQYTVDPKTD  
DIGGSIINAANKRPIPGSAGRFNYRNFPRFLGLSLMGVERQDVTINDKEPIYFAGVVYPD  
ATPKPAVMLHIRAEFGGVA FVDSREPEVHSTTPHFDTNYGPDFLTRDFLASAMLALG  
MTLGVL RDGVIMCERV

>CL166.Contig1\_Ba\_mix

XSHRFGGNSAYRSDEAHAYAAINPVVSNVRRAVGVSYSQGAPIVRSVSVEGPAPIAYSA  
AAPITYSGLGYAGYHL

>CL4124.Contig1\_Ba\_mix

PLTALLAVLLLLALVYWYGTKDFGSLEKLGVPVIKPYPFISILKPWESFCVSDDLQNA  
RKYGRLWGLYEGPWAQLFVADVDM AKHIMIKDFDHFQDRPVLFDFEYGRDQMDMM  
PADRWKVLRSLLAPALTTSGRLKAMTPTMQQCLDDACRRMETKLRDSPVIDAQADL  
FGPLTLDVMAQFSFGMKVPDVADKNSV FVKHASAFGVPTDATPNPLITYILTSFPSLG  
NRVAGRQLIPAFRYFLEMIRRSIKQRR AEGVHRPDLVGVIMDAIDNKVPTAEYRQLRL  
TEEILLLQGAEMLMAAYDTVGSALNKSAYFLATEPEAAEEVAQEAQELDELTYESVAQ  
LPKLEAFI KEVLRMAPLLVRHFRVCTR DWEYQGLRVPAGTSVTIPMSV FHMDEQLFP  
EARQFRPARWLEEDAHRSHQYSWMPFGLGPHACL GARLAMVECKFFLAGFLRRYRF  
LACDQTKFEYLP GSGLFAT
